# Supplementary material for: Social stratification without genetic differentiation at the site of Kulubnarti in Christian Period Nubia
Source: PubMed Central journal article supplement (PMC8671435; doi:10.1038/s41467-021-27356-8), 2021-12-14
Supplement: 41467_2021_27356_MOESM1_ESM.pdf [file 41467_2021_27356_MOESM1_ESM.pdf]

# Supplementary Information

## Social stratification without genetic differentiation at the site of Kulubnarti in Christian Period Nubia

Sirak et al.

### Table of Contents

|                                                                              |    |
|------------------------------------------------------------------------------|----|
| Supplementary Figures.....                                                   | 2  |
| Supplementary Tables.....                                                    | 9  |
| Supplementary Notes                                                          |    |
| Supplementary Note 1. Background of Kulubnarti.....                          | 13 |
| Supplementary Note 2. Radiocarbon dating.....                                | 19 |
| Supplementary Note 3. Genetic relatedness and consanguinity.....             | 24 |
| Supplementary Note 4. <i>qpAdm</i> .....                                     | 27 |
| Supplementary Note 5. Mitochondrial DNA analysis and haplogroup calling..... | 29 |
| Supplementary References.....                                                | 36 |

43 **Supplementary Figures**

44

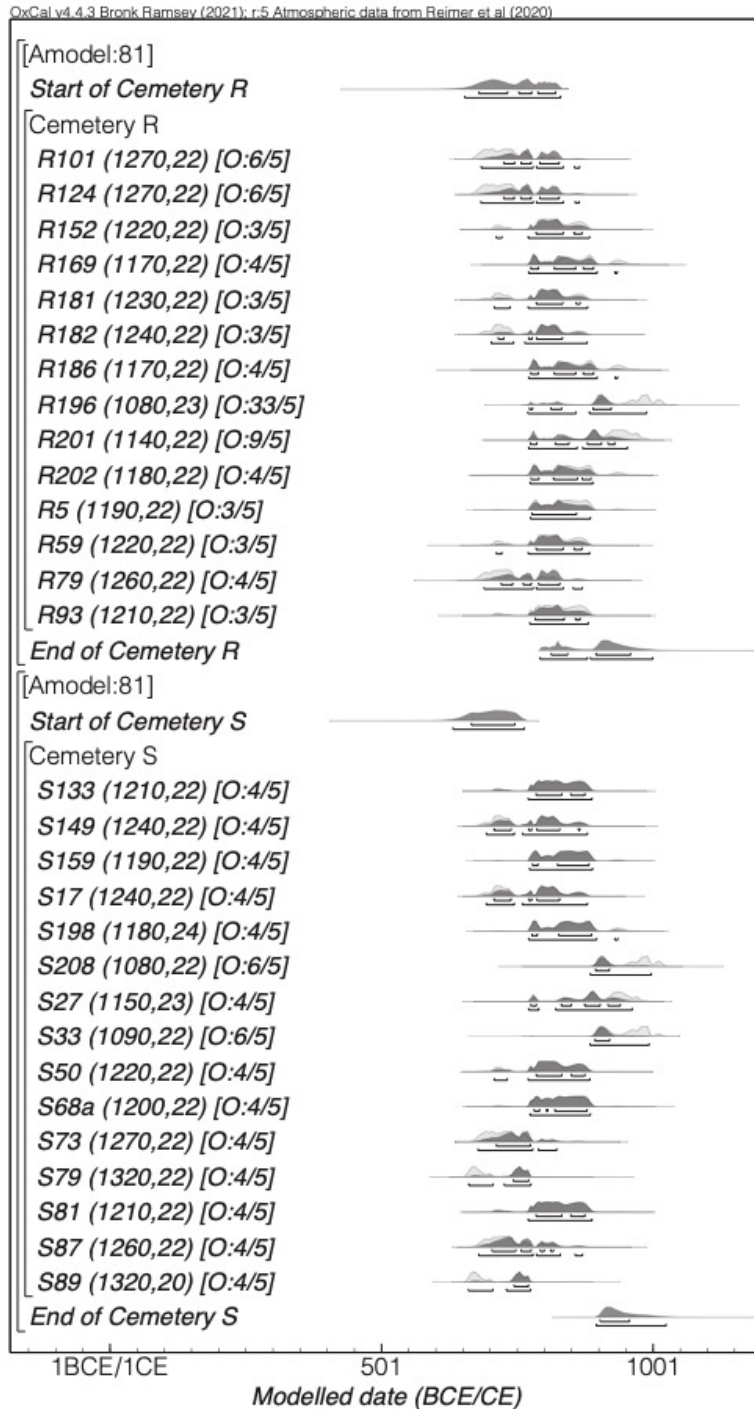

45

46

47 **Supplementary Figure 1.** Radiocarbon ( $^{14}\text{C}$ ) dates for 29 individuals from Kulubnarti (14 from  
 48 the R cemetery and 15 from the S cemetery). Labels are consistent with ‘Skeletal Code’ as in  
 49 Supplementary Data 2. Amodel=Agreement index for the model, with  $A \geq 60$  being the threshold  
 50 for an acceptable fit. O=Outlier probability, shown as posterior % probability/prior % probability  
 51 of the sample being an outlier. Details of  $^{14}\text{C}$  dating are in Supplementary Note 2.

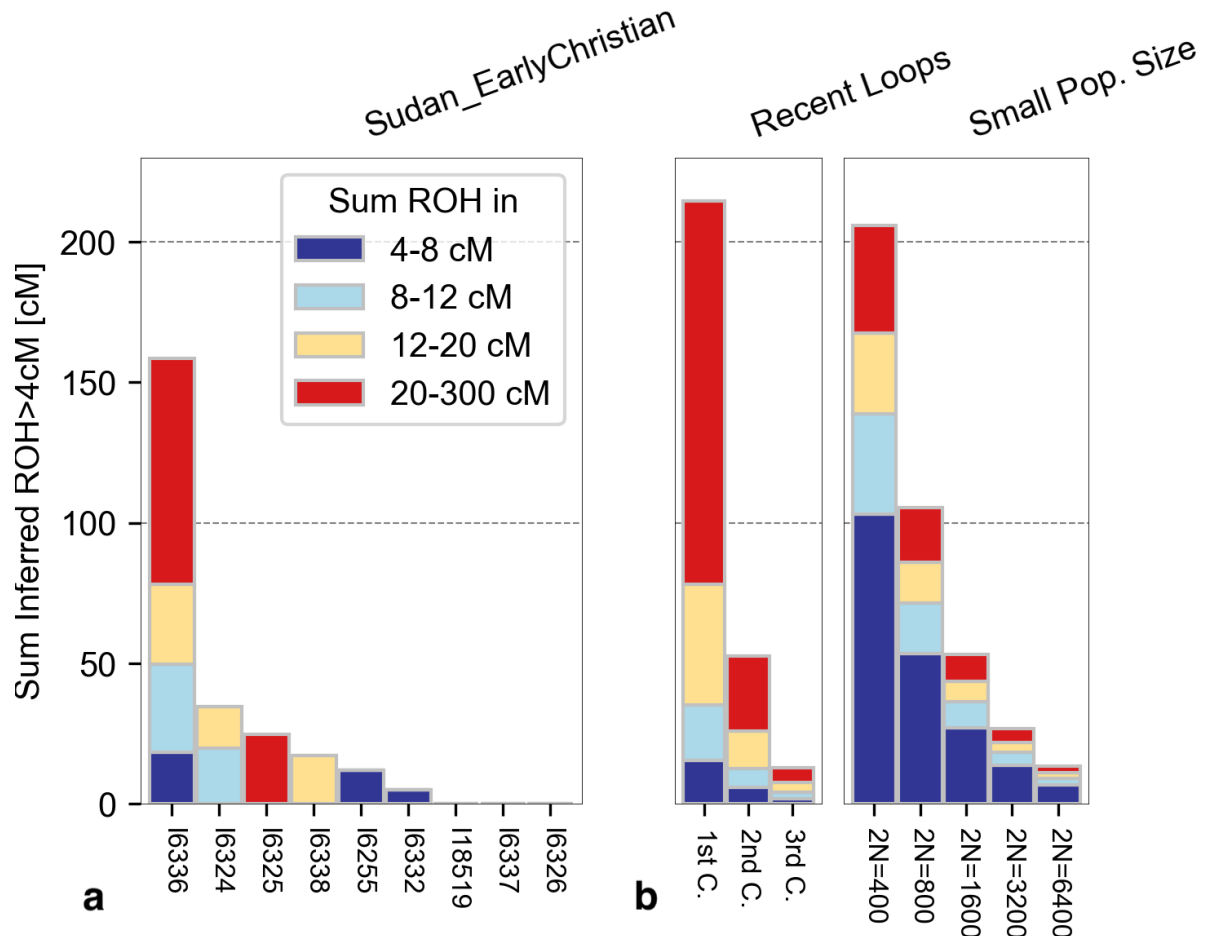

52  
53  
54  
55  
56  
57  
58  
59  
60

**Supplementary Figure 2. ROH calls in ancient individuals.** **a** We depict inferred ROH for 9 ancient individuals with >400,000 SNPs; labels are consistent with ‘Master ID (Lab)’ in Supplementary Data 2. Each vertical bar represents one individual, and we depict the total sums of ROH that fall into four length categories: 4-8 centiMorgan (cM; dark blue), 8-12cM (light blue), 12-20cM (yellow), and >20cM (red) for each individual. **b** ‘Recent Loops’ and ‘Small Pop. Size’ show analytical expectations and are calculated using the formulas reported in ref.<sup>1</sup>. “C.” represents “cousin.”

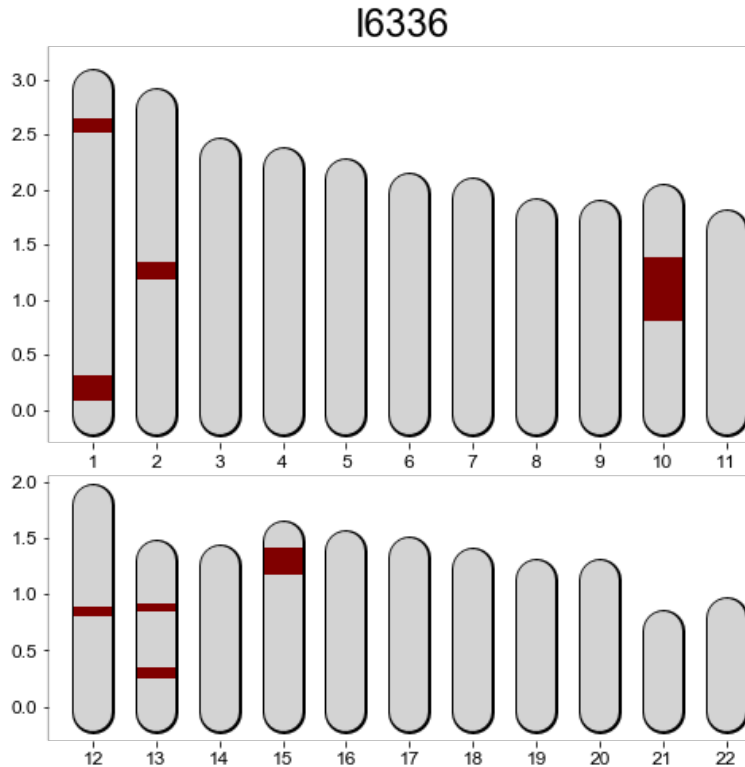

61  
62  
63  
64  
65  
66  
67  
68  
69  
70  
71  
72  
73  
74  
75  
76  
77  
78

**Supplementary Figure 3. Illustration of ROH blocks >4 cM for individual I6336/S27.** This individual has a total of 158.5cM of his genome in ROH blocks >4cM, with 20cM blocks comprising over half of the total sum (~80.2cM). We identified one extremely long block of ROH (~60cM) spanning a substantial part of Chromosome 10. The number and length of ROH in I6336 provides evidence of his parents being first cousins or a close genetic equivalent (see also Supplementary Figure 2). The units on the y-axis denote the sex-averaged genomic map length measured in Morgan.

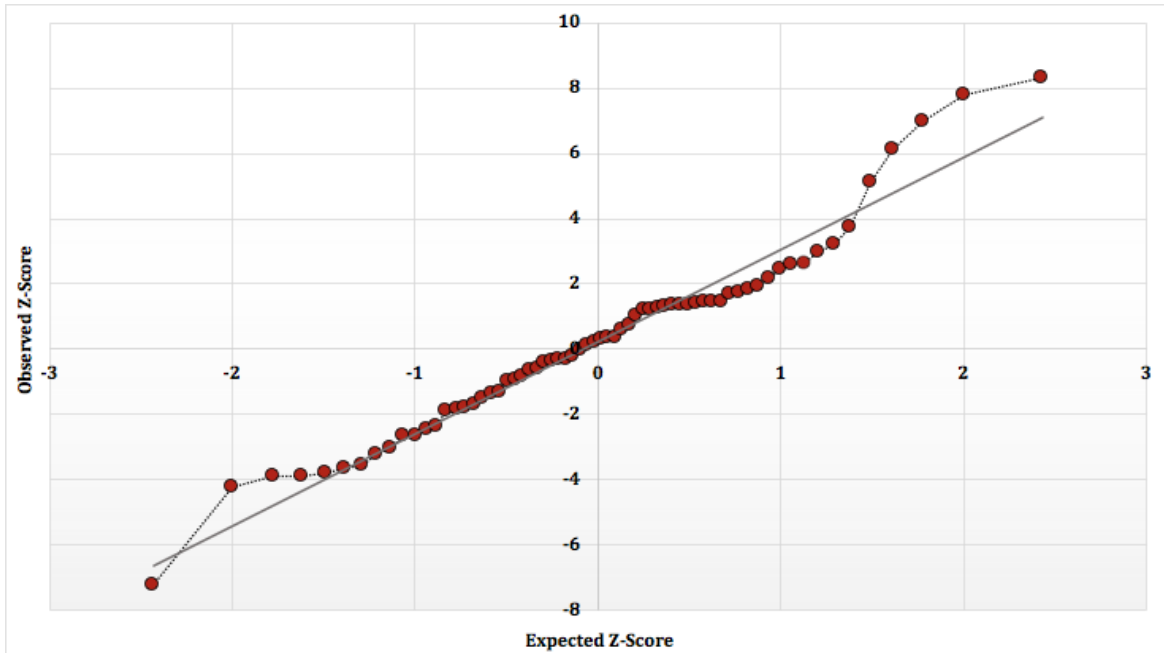

79  
 80  
 81  
 82  
 83  
 84  
 85  
 86  
 87  
 88  
 89  
 90  
 91  
 92  
 93  
 94

**Supplementary Figure 4.** Q-Q plot showing deviation from normal distribution of Z-scores for  $f_4(\text{Nilotic\_Test}, \text{WestEurasia\_Test}; \text{Individual}, \text{Kulubnarti\_Without\_Individual})$ . Data from Supplementary Data 6. Only ~27% of individuals fall within one standard deviation of the mean, while ~62% fall within two standard deviations, and ~76% fall within three standard deviations.

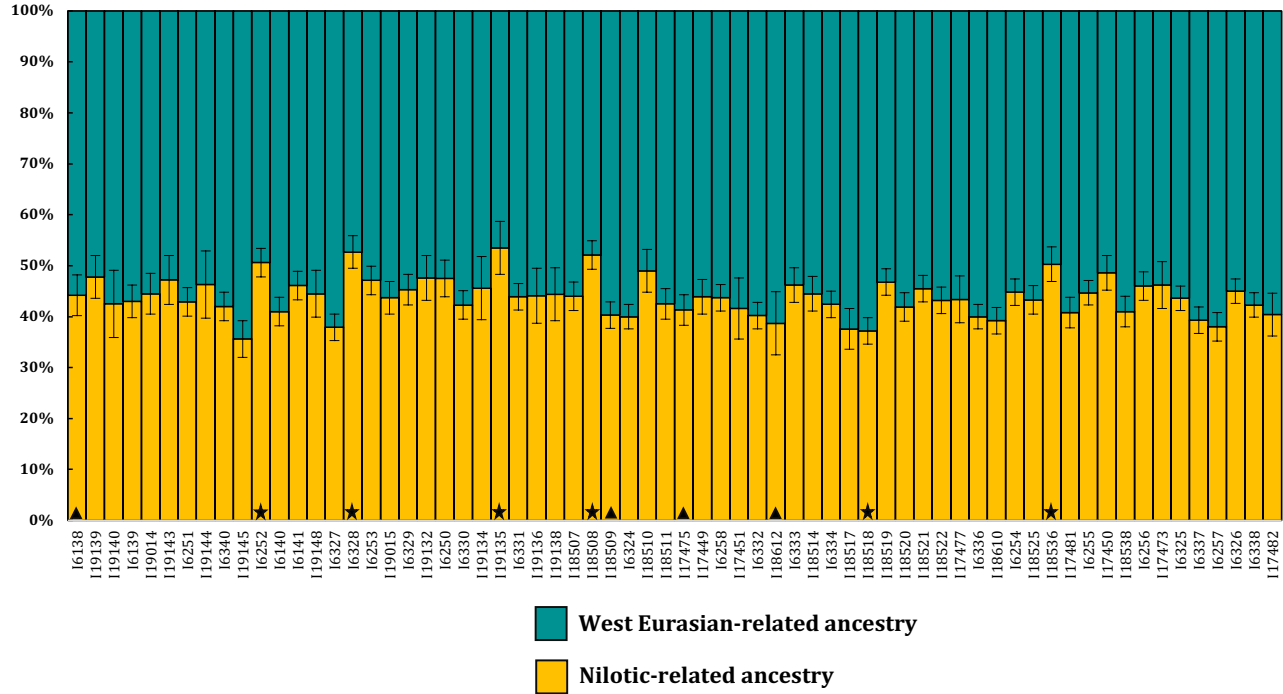

95  
 96  
 97  
 98  
 99  
 100  
 101  
 102  
 103  
 104  
 105  
 106  
 107  
 108  
 109  
 110  
 111  
 112  
 113  
 114  
 115  
 116

**Supplementary Figure 5.** Individual ancestry proportions for 66 individuals from Kulubnarti estimated using *qpAdm*. Labels are consistent with ‘Master ID (Lab)’ in Supplementary Data 2; data are in Supplementary Data 8. Error bars represent twice the standard error; standard errors computed with *qpAdm* using block jackknife (size of block jackknife 0.05 Morgan). A black star indicates that individual is a genetic outlier and a black triangle indicates that individual is a lower-coverage first-degree relative of another individual in our dataset.

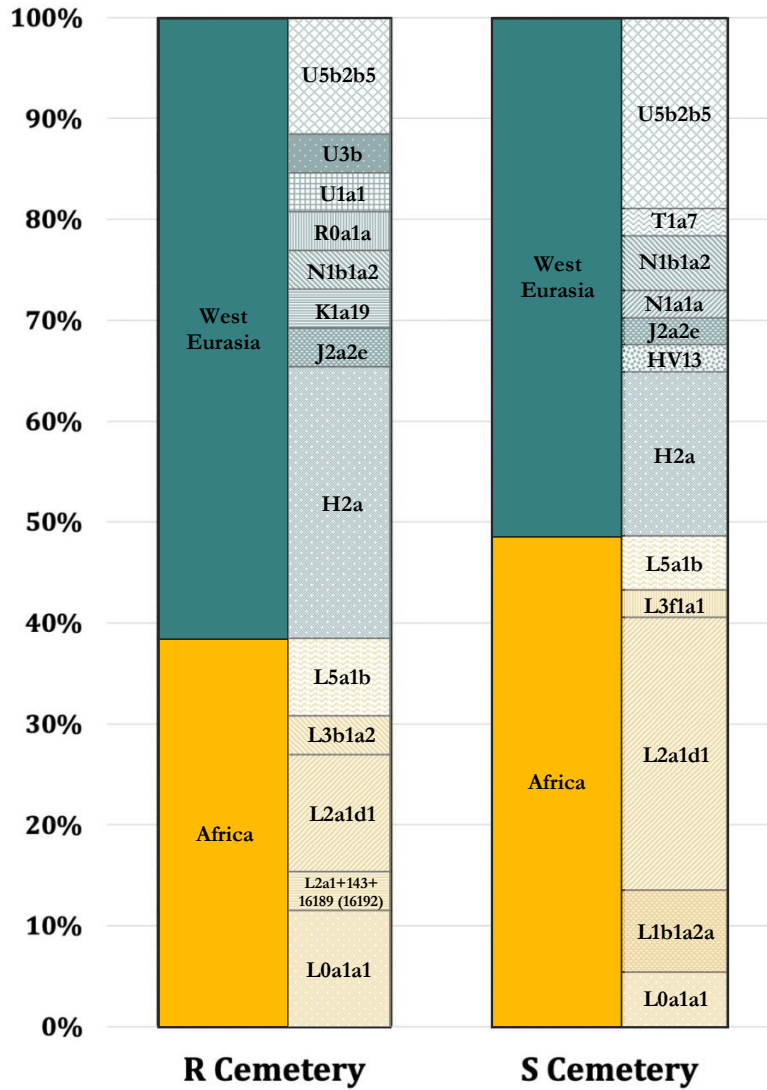

117  
 118  
 119  
 120  
 121  
 122  
 123  
 124  
 125  
 126  
 127  
 128  
 129  
 130  
 131  
 132  
 133

**Supplementary Figure 6.** mtDNA haplogroup calls for 63 individuals who were not first-degree relatives sharing a maternal lineage divided by cemetery of burial and grouped by most likely geographic region of origin and primary geographic distribution; data are in Supplementary Data 12.

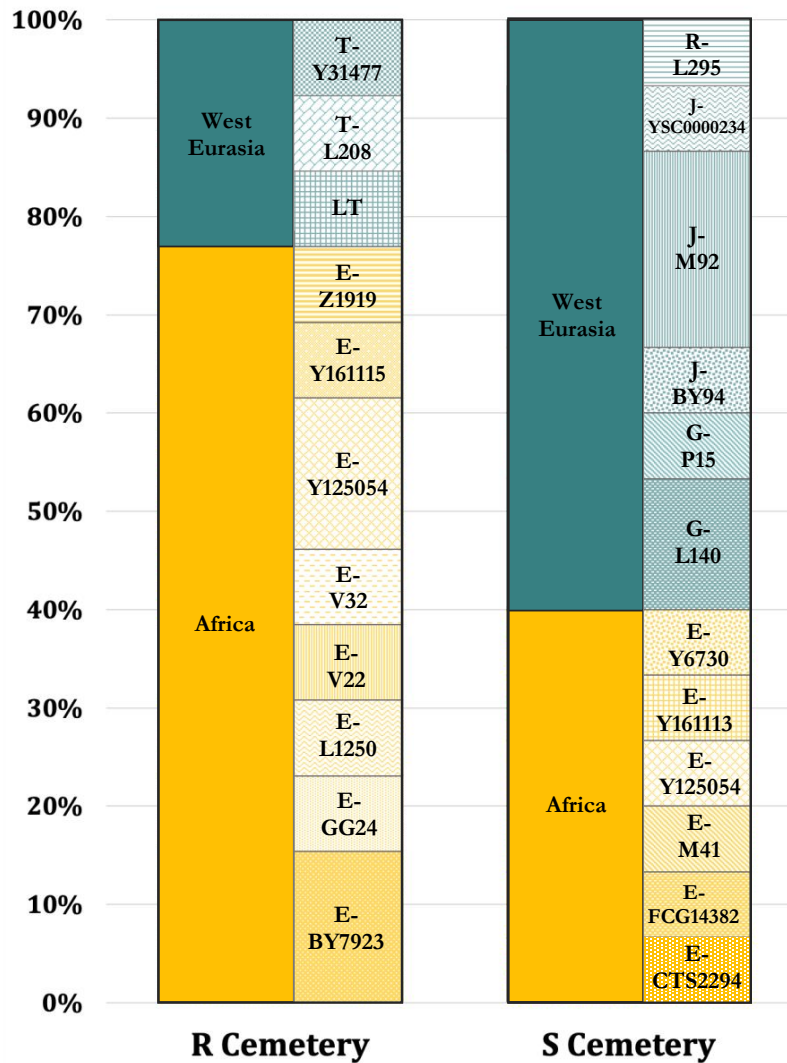

134  
 135  
 136  
 137  
 138  
 139  
 140  
 141  
 142  
 143  
 144  
 145  
 146  
 147  
 148  
 149  
 150

**Supplementary Figure 7.** Y haplogroup calls in terminal mutation notation for 28 males divided by cemetery of burial who were not first-degree relatives and grouped by most likely geographic region of origin and primary geographic distribution; data are in Supplementary Data 13.



151 **Supplementary Tables**

152

153 **Supplementary Table 1. Radiocarbon dates for 29 individuals from Kulubnarti.**

154

| UGA MS# | Master ID (Lab) | Skeletal code | Collagen yield, % | %C    | %N    | Atomic C:N ratio | $\delta^{13}\text{C}$ , ‰ VPDB | $\delta^{15}\text{N}$ , ‰ AIR | $^{14}\text{C}$ age years, BP | ±  | Unmodeled date, cal CE (68.3% probability range) | Unmodeled date, cal CE (95.4% probability range) |
|---------|-----------------|---------------|-------------------|-------|-------|------------------|--------------------------------|-------------------------------|-------------------------------|----|--------------------------------------------------|--------------------------------------------------|
| 34382   | I6138           | R101          | 15.9              | 44.99 | 15.48 | 3.4              | -16.5                          | 12.6                          | 1270                          | 22 | 680–770                                          | 660–820                                          |
| 34383   | I6139           | R124          | 16.5              | 43.12 | 15.32 | 3.3              | -17.0                          | 113                           | 1270                          | 22 | 680–770                                          | 660–820                                          |
| 34384*  | I6251           | R152          | 16.1              | 44.72 | 14.18 | 3.7              | -17.2                          | 12.7                          | 1220                          | 22 | 780–880                                          | 700–890                                          |
| 34385   | I6340           | R169          | 12.3              | 44.45 | 14.62 | 3.5              | -18.3                          | 11.5                          | 1170                          | 22 | 770–940                                          | 770–960                                          |
| 34386   | I6252           | R181          | 15.4              | 45.28 | 15.24 | 3.5              | -15.7                          | 12.8                          | 1230                          | 22 | 700–880                                          | 700–890                                          |
| 34387   | I6140           | R182          | 17.6              | 45.44 | 15.70 | 3.4              | -16.7                          | 12.6                          | 1240                          | 22 | 700–830                                          | 680–880                                          |
| 34388   | I6141           | R186          | 17.2              | 43.88 | 15.56 | 3.3              | -17.2                          | 12.6                          | 1170                          | 22 | 770–940                                          | 770–960                                          |
| 34389*  | I6327           | R196          | 15.6              | 46.53 | 14.34 | 3.8              | -17.6                          | 13.2                          | 1080                          | 23 | 890–1020                                         | 890–1030                                         |
| 34390   | I6328           | R201          | 16.7              | 45.46 | 15.31 | 3.5              | -16.4                          | 11.7                          | 1140                          | 22 | 880–980                                          | 770–990                                          |
| 34391*  | I6253           | R202          | 15.9              | 44.92 | 14.70 | 3.6              | -18.3                          | 11.5                          | 1180                          | 22 | 770–890                                          | 770–950                                          |
| 34392   | I6329           | R5            | 15.9              | 45.13 | 15.12 | 3.5              | -17.5                          | 11.7                          | 1190                          | 22 | 770–890                                          | 770–900                                          |
| 34393   | I6250           | R59           | 16.9              | 46.41 | 15.56 | 3.5              | -17.3                          | 10.8                          | 1220                          | 22 | 780–880                                          | 700–890                                          |
| 34394   | I6330           | R79           | 16.0              | 43.45 | 15.18 | 3.3              | -17.0                          | 12.1                          | 1260                          | 22 | 680–770                                          | 670–830                                          |
| 34395   | I6331           | R93           | 15.5              | 44.75 | 15.13 | 3.5              | -17.8                          | 11.5                          | 1210                          | 22 | 780–880                                          | 700–890                                          |
| 34396   | I6324           | S133          | 15.1              | 42.92 | 14.69 | 3.4              | -17.0                          | 12.5                          | 1210                          | 22 | 780–880                                          | 700–890                                          |
| 34397*  | I6258           | S149          | 6.3               | 45.47 | 13.54 | 3.9              | -19.1                          | 11.3                          | 1240                          | 22 | 700–830                                          | 680–880                                          |
| 34398   | I6332           | S159          | 13.2              | 44.70 | 15.20 | 3.4              | -17.8                          | 11.4                          | 1190                          | 22 | 770–890                                          | 770–900                                          |
| 34399   | I6333           | S17           | 15.1              | 43.65 | 14.85 | 3.4              | -18.0                          | 12.1                          | 1240                          | 22 | 700–830                                          | 680–880                                          |
| 34400*  | I6334           | S198          | 18.3              | 42.08 | 13.05 | 3.8              | -17.5                          | 12.5                          | 1180                          | 24 | 770–890                                          | 770–950                                          |
| 34401*  | I18519          | S208          | 18.4              | 48.03 | 11.63 | 4.8              | -18.1                          | 12.9                          | 1080                          | 22 | 890–1020                                         | 890–1030                                         |
| 34402*  | I6336           | S27           | 11.9              | 44.22 | 13.81 | 3.7              | -17.8                          | 12.4                          | 1150                          | 23 | 770–980                                          | 770–980                                          |
| 34403   | I6254           | S33           | 14.3              | 41.90 | 14.20 | 3.4              | -17.2                          | 11.3                          | 1090                          | 22 | 890–1000                                         | 890–1020                                         |
| 34404   | I6255           | S50           | 17.6              | 43.75 | 15.18 | 3.4              | -16.2                          | 11.9                          | 1220                          | 22 | 780–880                                          | 700–890                                          |
| 34405   | I6256           | S68a          | 12.7              | 44.39 | 15.42 | 3.4              | -16.3                          | 12.8                          | 1200                          | 22 | 780–880                                          | 770–890                                          |
| 34406   | I6325           | S73           | 13.2              | 45.57 | 15.78 | 3.4              | -17.9                          | 11.5                          | 1270                          | 22 | 680–770                                          | 660–820                                          |
| 34407   | I6337           | S79           | 24.1              | 45.75 | 15.97 | 3.3              | -15.9                          | 11.3                          | 1320                          | 22 | 660–780                                          | 650–780                                          |
| 34408*  | I6257           | S81           | 2.8               | 46.16 | 15.05 | 3.6              | -16.3                          | 12.5                          | 1210                          | 22 | 780–880                                          | 700–890                                          |
| 34409   | I6326           | S87           | 11.0              | 46.15 | 15.48 | 3.5              | -16.9                          | 11.5                          | 1260                          | 22 | 680–770                                          | 670–830                                          |
| 35229   | I6338           | S89           | 14.1              | 44.64 | 15.72 | 3.3              | -17.1                          | 12.0                          | 1320                          | 20 | 660–780                                          | 650–780                                          |

155 \*Samples with atomic C:N ratios outside of normal range of 3.1–3.5 (van Klinken 1999).

156

157 **Supplementary Table 2. Families at Kulubnarti.** Inter-cemetery kin pairs in bold; relationship  
 158 (if known) included. Relatives called following the method in ref.<sup>2</sup>.  
 159

| Family   | Relative 1        | Relative 2         | Intra- or inter-cemetery | Relationship (Degree) | Details                                                                                     |
|----------|-------------------|--------------------|--------------------------|-----------------------|---------------------------------------------------------------------------------------------|
| A        | I18522/S235       | I18521/S21         | intra-cemetery           | 3rd-4th               |                                                                                             |
| A        | I18507/S114       | I18522/S235        | intra-cemetery           | 2nd                   |                                                                                             |
| A        | I18507/S114       | I17449/S147        | intra-cemetery           | 3rd-4th               |                                                                                             |
| A        | I17449/S147       | I18522/S235        | intra-cemetery           | 2nd                   |                                                                                             |
| <b>B</b> | <b>I17450/S51</b> | <b>I19015/R21</b>  | <b>inter-cemetery</b>    | <b>2nd</b>            |                                                                                             |
| C        | I19145/R173       | I6330/R79          | intra-cemetery           | 2nd                   |                                                                                             |
| D        | I6256/S68a        | I17475/S144        | intra-cemetery           | 1st                   | siblings                                                                                    |
| E        | I6138/R101        | I6331/R93          | intra-cemetery           | 1st                   | brothers                                                                                    |
| E        | I6331/R93         | I19143/R150        | intra-cemetery           | 3rd-4th               |                                                                                             |
| <b>E</b> | <b>I6337/S79</b>  | <b>I19143/R150</b> | <b>inter-cemetery</b>    | <b>3rd-4th</b>        |                                                                                             |
| F        | I6250/R59         | I6251/R152         | intra-cemetery           | 2nd                   |                                                                                             |
| <b>F</b> | <b>I6251/R152</b> | <b>I6255/S50</b>   | <b>inter-cemetery</b>    | <b>3rd-4th</b>        |                                                                                             |
| F        | I6255/S50         | I6333/S17          | intra-cemetery           | 2nd                   |                                                                                             |
| F        | I6333/S17         | I18514/S182        | intra-cemetery           | 3rd-4th               |                                                                                             |
| G        | I18612/S16        | I18610/S29         | intra-cemetery           | 1st                   | father (I18612/S16) and son (I18610/S29)                                                    |
| G        | I6336/S27         | I18610/S29         | intra-cemetery           | 3rd-4th               |                                                                                             |
| G        | I6324/S133        | I6336/S27          | intra-cemetery           | 3rd-4th               |                                                                                             |
| G        | I6336/S27         | I18518/S201        | intra-cemetery           | 3rd-4th               |                                                                                             |
| G        | I6336/S27         | I17481/S45         | intra-cemetery           | 3rd-4th               |                                                                                             |
| G        | I18525/S37        | I6336/S27          | intra-cemetery           | 2nd                   |                                                                                             |
| G        | I6324/S133        | I18509/S132        | intra-cemetery           | 1st                   | sisters                                                                                     |
| G        | I18538/S53        | I6324/S133         | intra-cemetery           | 2nd                   |                                                                                             |
| G        | I18538/S53        | I18509/S132        | intra-cemetery           | 3rd-4th               |                                                                                             |
| <b>H</b> | <b>I6325/S73</b>  | <b>I19132/R57</b>  | <b>inter-cemetery</b>    | <b>3rd-4th</b>        |                                                                                             |
| <b>H</b> | <b>I19134/R84</b> | <b>I6254/S33</b>   | <b>inter-cemetery</b>    | <b>2nd</b>            |                                                                                             |
| <b>H</b> | <b>I6254/S33</b>  | <b>I19132/R57</b>  | <b>inter-cemetery</b>    | <b>3rd-4th</b>        |                                                                                             |
| <b>H</b> | <b>I17451/S15</b> | <b>I19132/R57</b>  | <b>inter-cemetery</b>    | <b>uncertain</b>      | <b>low SNP coverage precludes us from determining the exact degree of this relationship</b> |
| H        | I19132/R57        | I19134/R84         | intra-cemetery           | uncertain             | low SNP coverage precludes us from determining the exact degree of this relationship        |

160  
 161  
 162  
 163  
 164  
 165  
 166

167 **Supplementary Table 3. Runs of homozygosity (ROH) segments >4cM for individuals with**  
 168 **sufficient coverage (>400,000 SNPs covered).** Number of ROH segments longer than a specified  
 169 size denoted by ‘n\_roh’ and sum of ROH segment lengths longer than a specified size denoted by  
 170 ‘sum\_roh.’  
 171

| Master ID (Lab) | Skeletal Code | sum_roh >4 | n_roh >4 | sum_roh >8 | n_roh >8 | sum_roh >12 | n_roh >12 | sum_roh >20 | n_roh >20 |
|-----------------|---------------|------------|----------|------------|----------|-------------|-----------|-------------|-----------|
| I18519          | S208          | 0          | 0        | 0          | 0        | 0           | 0         | 0           | 0         |
| I6337           | S79           | 0          | 0        | 0          | 0        | 0           | 0         | 0           | 0         |
| I6326           | S87           | 0          | 0        | 0          | 0        | 0           | 0         | 0           | 0         |
| I6332           | S159          | 5.1613     | 1        | 0          | 0        | 0           | 0         | 0           | 0         |
| I6255           | S50           | 12.0226    | 2        | 0          | 0        | 0           | 0         | 0           | 0         |
| I6338           | S89           | 17.3308    | 1        | 17.3308    | 1        | 17.3308     | 1         | 0           | 0         |
| I6325           | S73           | 24.7553    | 1        | 24.7553    | 1        | 24.7553     | 1         | 24.7553     | 1         |
| I6324           | S133          | 34.6752    | 3        | 34.6752    | 3        | 14.8383     | 1         | 0           | 0         |
| I6336           | S27           | 158.5166   | 10       | 139.9770   | 7        | 108.9109    | 4         | 80.2499     | 2         |

172  
 173  
 174  
 175  
 176 **Supplementary Table 4. FST between the individuals in the Kulubnarti R and S cemeteries.**  
 177

| A            | B            | F <sub>ST</sub> | std err |
|--------------|--------------|-----------------|---------|
| Kulubnarti_R | Kulubnarti_S | 0.001331        | 0.00053 |

178  
 179  
 180  
 181  
 182  
 183  
 184  
 185  
 186  
 187  
 188  
 189  
 190  
 191  
 192  
 193  
 194  
 195  
 196

197 **Supplementary Table 5. Z-scores for differences in admixture date inferences for all pairs**  
 198 **of individuals with *DATES* estimates and direct <sup>14</sup>C dates.** Pairwise Z-scores calculated using  
 199 data in Supplementary Data 11 as  $\frac{(date1-date2)}{\sqrt{(se1)^2+(se2)^2}}$ . A Bonferroni correction was applied to correct  
 200 for multiple hypotheses tested (n=190); the adjusted threshold for significance is  $|Z|>3.65$ . Tests  
 201 surpassing this threshold are in yellow cells; negative values are in red text.

202  
 203

|      | S133 | R182 | R79 | S159 | R101 | R124 | S81 | S50 | R202 | S68a | R186 | S79 | S27 | R93 | S33 | S89 | S87 | R5  | S73 | R196 |
|------|------|------|-----|------|------|------|-----|-----|------|------|------|-----|-----|-----|-----|-----|-----|-----|-----|------|
| S133 |      | 0.3  | 0.8 | 0.4  | 1.0  | 1.0  | 0.6 | 0.9 | 1.0  | 1.4  | 1.4  | 2.5 | 1.5 | 1.7 | 1.1 | 2.4 | 2.6 | 2.1 | 3.9 | 4.1  |
| R182 | 0.3  |      | 0.4 | 0.1  | 0.6  | 0.6  | 0.3 | 0.5 | 0.6  | 0.8  | 0.8  | 1.6 | 0.8 | 1.0 | 0.6 | 1.6 | 1.8 | 1.4 | 2.7 | 2.8  |
| R79  | 0.8  | 0.4  |     | 0.3  | 0.1  | 0.3  | 0.0 | 0.1 | 0.1  | 0.3  | 0.4  | 1.2 | 0.4 | 0.6 | 0.2 | 1.2 | 1.5 | 1.1 | 2.5 | 2.6  |
| S159 | 0.4  | 0.1  | 0.3 |      | 0.5  | 0.6  | 0.2 | 0.4 | 0.5  | 0.7  | 0.7  | 1.4 | 0.7 | 0.9 | 0.5 | 1.5 | 1.7 | 1.3 | 2.6 | 2.7  |
| R101 | 1.0  | 0.6  | 0.1 | 0.5  |      | 0.2  | 0.1 | 0.0 | 0.0  | 0.2  | 0.2  | 0.9 | 0.2 | 0.4 | 0.0 | 1.0 | 1.3 | 0.9 | 2.2 | 2.3  |
| R124 | 1.0  | 0.6  | 0.3 | 0.6  | 0.2  |      | 0.3 | 0.2 | 0.2  | 0.1  | 0.0  | 0.5 | 0.0 | 0.2 | 0.1 | 0.7 | 0.9 | 0.6 | 1.6 | 1.6  |
| S81  | 0.6  | 0.3  | 0.0 | 0.2  | 0.1  | 0.3  |     | 0.1 | 0.1  | 0.3  | 0.3  | 0.8 | 0.3 | 0.5 | 0.2 | 0.9 | 1.2 | 0.8 | 1.8 | 1.8  |
| S50  | 0.9  | 0.5  | 0.1 | 0.4  | 0.0  | 0.2  | 0.1 |     | 0.0  | 0.2  | 0.2  | 0.9 | 0.2 | 0.4 | 0.1 | 1.0 | 1.3 | 0.9 | 2.1 | 2.2  |
| R202 | 1.1  | 0.6  | 0.1 | 0.5  | 0.0  | 0.2  | 0.1 | 0.0 |      | 0.2  | 0.3  | 1.2 | 0.3 | 0.5 | 0.1 | 1.2 | 1.5 | 1.0 | 2.7 | 2.8  |
| S68a | 1.4  | 0.8  | 0.3 | 0.7  | 0.2  | 0.1  | 0.3 | 0.2 | 0.2  |      | 0.1  | 1.1 | 0.0 | 0.3 | 0.1 | 1.1 | 1.5 | 0.9 | 2.8 | 3.0  |
| R186 | 1.4  | 0.8  | 0.4 | 0.7  | 0.2  | 0.0  | 0.3 | 0.2 | 0.3  | 0.1  |      | 0.9 | 0.1 | 0.3 | 0.2 | 1.0 | 1.3 | 0.8 | 2.6 | 2.7  |
| S79  | 2.5  | 1.6  | 1.2 | 1.4  | 0.9  | 0.5  | 0.8 | 0.9 | 1.1  | 1.1  | 0.9  |     | 1.1 | 0.6 | 1.0 | 0.3 | 0.7 | 0.1 | 2.1 | 2.3  |
| S27  | 1.5  | 0.8  | 0.4 | 0.7  | 0.2  | 0.0  | 0.3 | 0.2 | 0.3  | 0.0  | 0.1  | 1.1 |     | 0.3 | 0.2 | 1.2 | 1.5 | 0.9 | 2.9 | 3.0  |
| R93  | 1.7  | 1.0  | 0.6 | 0.9  | 0.4  | 0.2  | 0.5 | 0.4 | 0.5  | 0.3  | 0.3  | 0.6 | 0.3 |     | 0.4 | 0.7 | 1.1 | 0.6 | 2.3 | 2.4  |
| S33  | 1.1  | 0.6  | 0.2 | 0.5  | 0.0  | 0.1  | 0.2 | 0.1 | 0.1  | 0.1  | 0.2  | 1.0 | 0.2 | 0.4 |     | 1.1 | 1.4 | 0.9 | 2.5 | 2.6  |
| S89  | 2.4  | 1.6  | 1.2 | 1.5  | 1.0  | 0.7  | 0.9 | 1.0 | 1.2  | 1.1  | 1.0  | 0.3 | 1.2 | 0.7 | 1.1 |     | 0.4 | 0.1 | 1.5 | 1.6  |
| S87  | 2.6  | 1.8  | 1.5 | 1.7  | 1.3  | 0.9  | 1.2 | 1.3 | 1.5  | 1.5  | 1.3  | 0.7 | 1.5 | 1.1 | 1.4 | 0.4 |     | 0.5 | 0.9 | 0.9  |
| R5   | 2.1  | 1.4  | 1.1 | 1.3  | 0.9  | 0.6  | 0.8 | 0.9 | 1.0  | 0.9  | 0.8  | 0.1 | 0.9 | 0.6 | 0.9 | 0.1 | 0.5 |     | 1.4 | 1.4  |
| S73  | 3.9  | 2.7  | 2.5 | 2.6  | 2.2  | 1.6  | 1.8 | 2.1 | 2.6  | 2.8  | 2.6  | 2.1 | 2.9 | 2.3 | 2.5 | 1.5 | 0.9 | 1.4 |     | 0.1  |
| R196 | 4.1  | 2.8  | 2.6 | 2.7  | 2.3  | 1.6  | 1.8 | 2.2 | 2.7  | 3.0  | 2.7  | 2.3 | 3.0 | 2.4 | 2.6 | 1.6 | 0.9 | 1.4 | 0.1 |      |

204  
 205  
 206  
 207  
 208  
 209  
 210  
 211  
 212  
 213  
 214  
 215

## 216 **Supplementary Note 1 – Background of Kulubnarti**

217  
218 The site of Kulubnarti (“Island of Kulb” in the Mahasi dialect of Nubian) is located on the bank  
219 of the Nile River in Sudanese Nubia, approximately 120 kilometers south of the present-day  
220 Sudanese city of Wadi Halfa. The site was first discovered in 1969. Excavation of the Christian  
221 Period village of Kulubnarti and survey of the associated cemeteries occurred that year, while  
222 excavation of the two contemporaneous and geographically-proximate cemeteries, one on  
223 Kulubnarti island and one on the western bank opposite the south end of the island, occurred in  
224 1979 as part of the United Nations Educational, Scientific, and Cultural Organization (UNESCO)  
225 International Campaign to Save the Monuments of Nubia. This campaign was conducted in  
226 response to the impending destruction of Nubia caused by the construction of a new High Aswan  
227 Dam, which started in 1947. Unlike the reservoir created by the first Aswan Dam, which was  
228 emptied during part of each year, the High Aswan Dam created a permanent lake (Lake Nubia in  
229 Sudan and Lake Nasser in Egypt). More than forty expeditions were consequently planned and  
230 conducted between the Egyptian border and the head of the proposed reservoir prior to the Dam’s  
231 construction. These expeditions discovered over 1,000 archaeological sites and excavated nearly  
232 one-third of them<sup>4</sup>.

233 We consider Kulubnarti to include both the large trapezoidal island of Kulb (dimensions  
234 approximately 1 km by 2 km) as well the adjacent west bank. Prior to the creation of Lake Nubia,  
235 Kulubnarti was a headland projecting into the Nile River from the western bank. While the island  
236 and mainland are presently separated by a narrow channel, they were connected during the  
237 Christian Period (~550-1400 CE) except at the peak of the Nile flood<sup>3</sup>.

238 Detailed information regarding the architectural<sup>3</sup>, artifactual<sup>5</sup>, and human<sup>6</sup> remains from  
239 Kulubnarti have been published in a series of three monographs. An overview of the site, the  
240 cemeteries, and the people who inhabited Kulubnarti during the Christian Period will be provided  
241 here, and the genetic data newly generated by this work will be presented in the main manuscript  
242 and integrated into the existing framework built by archaeological work.

### 243 244 **The site of Kulubnarti**

245 Kulubnarti is situated within the *Batn el Hajar* region of Nubia, an inhospitable area that separated  
246 Egyptian-influenced Lower Nubia (the land between the First and Second Cataracts of the Nile)  
247 and the rest of Upper Nubia (the land below the Second Cataract of the Nile)<sup>7</sup> (see Figs. 1a and 1b

248 in the main manuscript). This region is described to be the most “barren and forbidding of all  
249 Nubian environments,” with a “lunar” feeling characterized by steep riverbanks, countless *jebels*  
250 (large outcroppings of rock), and sharp *wadis* (channels that are dry except in the rainy season)<sup>4,8</sup>.  
251 The Nile becomes unnavigable in the *Batn el Hajar*, coursing through granite rapids and hundreds  
252 of riverine islands. While this area supported scattered populations who built small villages and  
253 hamlets clustered around the region’s few floodplains, this terrain also functioned as a natural  
254 deterrent against the infiltration by foreign peoples. Based on a combination of environmental and  
255 political factors, the *Batn el Hajar* garnered the reputation as being the “granite curtain” that  
256 dissuaded the movement of peoples from Egypt and the Arabic world southward along the Nile  
257 River<sup>4</sup>. It is specifically suggested that this “granite curtain” protected the inhabitants of Upper  
258 Nubia from the gradual expansion of Islamic influence until at least the 12<sup>th</sup> century CE<sup>4</sup>.

259 Kulubnarti was a small hamlet located on the bank of the Nile at a location where some alluvial  
260 soil was present, but also where there was no continuous floodplain. Archaeological evidence  
261 suggests that it is likely that population density at Kulubnarti (consistent with other sites in the  
262 *Batn al Hajar*) was consistently low, and that the population that inhabited this site was always  
263 relatively impoverished compared to contemporaneous populations in more fertile regions along  
264 the Nile River to the north and south<sup>9</sup>. While there is some evidence of mat, basket, and sandal-  
265 making at Kulubnarti throughout the entirety of the Christian Period, a notable lack of specialized  
266 craft and imported goods suggests that subsistence agriculture was likely the main activity<sup>5,9</sup>.

267 Due to a paucity of arable land, individual landholdings at Kulubnarti were very small and highly-  
268 valued. The channel that separates the island from the mainland was farmed using *seluka*  
269 cultivation (a type of cultivation practice that relies on alluvium gradually exposed as the Nile  
270 receded from its annual flood) to grow legumes and other fodder crops<sup>3,4,6,10</sup>. Isotopic data suggest  
271 that dietary consumption at Kulubnarti was primarily based on ‘winter’ C<sup>3</sup> plants harvested in  
272 April (including barley, legumes, and wheat), with some consumption of ‘summer’ C<sup>4</sup> plants  
273 harvested in June (including sorghum and millet)<sup>11-13</sup>; this is largely consistent with dietary  
274 patterns throughout rural areas of Nubia today<sup>4,10</sup>. Animals (including goats, cattle, sheep, and  
275 pigs) were kept in small numbers, but animal meat was uncommon in the diet<sup>9,11,13</sup>; instead the  
276 Nubians obtained their protein primarily from plant sources<sup>4,14</sup>. The range of isotopic values and  
277 lack of archaeological evidence suggests that consumption of riverine products such as fish was  
278 rare, indicating that the Kulubnarti Nubians subsisted upon a terrestrially-based diet<sup>4,11</sup>.

279 **The Kulubnarti cemeteries**

280 Human skeletal remains were recovered from two cemeteries at Kulubnarti. Site 21-S-46 (the ‘S  
281 cemetery’) was situated within a dry ancient *wadi* near the west side of Kulubnarti Island, and site  
282 21-R-2 (the ‘R cemetery’) was located on the mainland’s west bank<sup>6</sup> (see Fig. 1b).

283 In the S cemetery, the earliest graves were of pre-Christian type, with a clear transition into  
284 Christian-style graves, identified by grave orientation, body positioning, and burial shrouds<sup>6</sup>. The  
285 total number of graves in the S cemetery remains unknown, though estimations place this number  
286 at approximately 300<sup>6</sup>. During the 1979 excavation, 218 graves were excavated, and 215 bodies  
287 were uncovered from this cemetery. Most of the graves were slot graves (straight-sided pits with  
288 rounded or square ends) that had a covering at the surface, most often simple pavements of flat but  
289 unshaped granite slabs arranged in a rectangle over the top of the grave<sup>6</sup>. Each of the excavated  
290 graves had an east-west orientation with the head of the body placed at the west end, as is typical  
291 for Christian-style burials<sup>6</sup>. Most individuals, regardless of sex or age, were wrapped in a shroud;  
292 however, as is common with Christian burials, recovery of any personal goods included in the  
293 graves was rare<sup>6</sup>.

294 The R cemetery was located next to a Classic Christian Period (850–1100 CE) domed church as  
295 well as an Early Christian Period (~550-800 CE) walled settlement<sup>6</sup>. In addition to Christian Period  
296 graves dug into a barren alluvial surface that merged with the Nile floodplain, Islamic-type graves  
297 were found at one end of the R cemetery. It was estimated that the R cemetery contained between  
298 500 and 600 graves<sup>6</sup>. A total of 188 graves were opened during the 1979 expedition, all but six of  
299 which were concentrated in one contiguous area at the far western end of the cemetery. The  
300 concentration of all burials excavated from the R cemetery at the far western end of the cemetery  
301 raises the concern that this sample in particular may not be representative of the cemetery as a  
302 whole<sup>6</sup>; however, there is little additional evidence to suggest that it is not. From these 188 graves,  
303 a total of 191 bodies were recovered<sup>6</sup>. It has been noted that the graves from the R cemetery  
304 exhibited no typological distinction from those at the S cemetery<sup>6</sup>. While the orientation of graves  
305 at the R cemetery was more erratic than at the S cemetery, this difference has been attributed to  
306 the lack of any topographic feature on the western horizon that could serve as an orientation point.  
307 Consistent with the S cemetery, the R cemetery most frequently exhibited slot graves, high  
308 frequency of burial shrouds, and limited grave goods<sup>6</sup>.

309 A lack of distinctive grave goods presented challenges for the precise dating of the Kulubnarti  
310 cemeteries<sup>6</sup>. The original interpretation of the available archaeological data was that the two  
311 cemeteries were used in successive periods with partial overlap. Specifically, analysis of pottery  
312 within the graves as well as architectural associations originally suggested that the S cemetery  
313 represented a population from the Early Christian Period (550–800 CE), while the presence of  
314 vaulted brick tombs and both Christian and Muslim burial styles suggested that the R cemetery  
315 was in use from the Early Christian through the Terminal Christian Period (550–1400 CE)<sup>9,15</sup>.  
316 Analysis of the textiles found in the graves of both cemeteries, however, suggested that the textiles  
317 found exhibited characteristics of Nubian textiles from the Early Christian Period, including a high  
318 percentage of woolen fabrics, a low percentage of cotton fabrics, an even lower percentage of flax,  
319 absence of silk, and rare occurrence of dyed color<sup>6</sup>. The contemporaneity of the cemeteries was  
320 further supported by a small sample of radiocarbon dates<sup>16</sup>; additional support for their  
321 contemporaneity is provided by the 29 new radiocarbon dates assembled as part of this work (see  
322 Supplementary Table 1 for direct dates).

323

#### 324 **Human osteological remains from Kulubnarti**

325 Following their excavation and exportation to UC Boulder, an assessment of age and sex was  
326 conducted by Dr. Dennis Van Gerven. Developmental age at death was determined based on a  
327 seriation technique that examined inter-individual variation in multiple well-established ageing  
328 criteria, including stages of dental eruption<sup>17,18</sup>, epiphyseal fusion<sup>18,19</sup>, and age-related changes in  
329 the pubic bones<sup>20-22</sup>. Population-specific patterns of dental attrition and skeletal degenerative  
330 changes were also considered<sup>6</sup>. Age estimations were made for 399 out of 406 individuals by  
331 arranging all individuals in a graded developmental series. Sex was determined for adults based  
332 on dimorphic skeletal features, including features of the pelvis<sup>23,24</sup>, cranium<sup>19,25</sup>, and long bones<sup>26</sup>.  
333 Residual soft tissue occasionally enabled the determination of sex in subadults. All data are  
334 published in ref.<sup>6</sup>. Both morphological and genetic sex (determined as part of this work) are  
335 provided in Supplementary Data 1.

336 Most individuals from Kulubnarti appeared macroscopically well-preserved because the heat and  
337 aridity of the Nubian environment encouraged soft tissue preservation; over half of the individuals  
338 recovered had some preserved soft tissue in the form of skin, tendons, or muscles, and over one-  
339 third of the individuals still had hair. In addition to heat, the soft tissue preservation is due in part



340 to the location of both Kulubnarti cemeteries away from the Nile flood. Specifically, though the  
341 Nile flooded annually, the location of the S cemetery was at least 10 meters above the level of the  
342 Nile floodplain in the Early Christian Period and had not been exposed to flooding in recent  
343 millennia. The R cemetery sample was selected from the area of highest ground in the cemetery,  
344 making it unlikely that any burials were affected by flooding<sup>6</sup>.

345 Several decades of bioarchaeological research were conducted on the human osteological remains  
346 from Kulubnarti. Two primary observations were made through this work. The first observation  
347 was that studies of biological distance (“biodistance”) suggested a close biological relationship  
348 between the individuals recovered from the Kulubnarti R and S cemeteries. Comparing  
349 craniometric data collected from individuals recovered from the R and S cemeteries to a time-  
350 series from Wadi Halfa (located ~130km to the north), Van Gerven<sup>27</sup> determined that the principal  
351 discrimination was between Wadi Halfa and Kulubnarti, while the least significant difference was  
352 between the R and S cemeteries. Morphological similarity between individuals in the R and S  
353 cemeteries was also detected through the analysis of cranial nonmetric traits<sup>28</sup>. In addition, the  
354 application of multivariate statistics to discrete dental data identified no significant variation  
355 between the R and S cemeteries<sup>29</sup>.

356 Despite morphological similarity, the second observation was that individuals buried in the S  
357 cemetery were exposed to more stress, experienced more ill-health, and died younger than the  
358 individuals buried in the R cemetery. Cribra orbitalia, a commonly-used indicator of generalized  
359 stress, was found in 94% of S cemetery children in comparison to 82% of R cemetery children,  
360 indicating a higher degree of childhood stress for individuals buried in the S cemetery<sup>15,30</sup>. A  
361 similar pattern was seen for linear enamel hypoplasias (LEHs), another indicator of generalized  
362 stress. While a nearly universal presence of LEH lesions were found in both cemeteries at  
363 Kulubnarti, the lesions appeared more frequently and were maintained at a higher frequency for  
364 longer in individuals from the S cemetery, leading to a prolonged period of intensified childhood  
365 mortality<sup>31</sup>. The increased frequency of stress-induced lesions found in individuals buried in the S  
366 cemetery corresponds to increased childhood mortality. Mean life expectancy computed from  
367 composite life tables<sup>32</sup> revealed that while differences in mortality after childhood were minimal,  
368 mortality between birth and age eight was significantly higher for individuals buried in the S  
369 cemetery than the R cemetery<sup>6</sup>. Therefore, probabilities of dying were not only higher for the  
370 children interred in the S cemetery, but chances of dying remain higher for longer<sup>9</sup>. This resulted

371 in an average life expectancy of 10.6 years for the S cemetery overall compared to 18.8 years for  
372 the R cemetery<sup>9</sup>. The differences in morbidity and mortality between the S and R cemeteries were  
373 not attributable to variation in diet<sup>11</sup>. Analysis of carbon, nitrogen, and oxygen isotopes from bone  
374 tissue indicates no significant relationships between isotopic indicators and cemetery of burial,  
375 suggesting no isotopically-measurable differences in proportional dietary composition<sup>11</sup>.

376 These two observations made using the human osteological material from Kulubnarti, taken  
377 together with material (textile) evidence of more prosperous people buried in the R cemetery than  
378 the S cemetery, but otherwise little difference in grave types or grave goods, led researchers to  
379 conclude that two biologically-related and culturally-indistinguishable, but socially-distinct  
380 groups of people lived side-by-side at Kulubnarti, and that one of these groups was considerably  
381 better-off than the other<sup>6</sup>. To explain this possible social stratification, anthropologists drew upon  
382 ethnographic evidence from present-day Nubia that describes groups of impoverished, landless,  
383 semi-nomadic persons who act as sharecroppers or seasonal laborers for landowning Nubian  
384 families, otherwise living off small flocks of sheep and goats. These people are known locally as  
385 the Nubian ‘underclass’<sup>33</sup>. The well-evidenced disparity between the people buried in the R and S  
386 cemeteries at Kulubnarti supported a hypothesis that such a social structure might have existed  
387 during the Christian Period as well, and that the individuals buried in the S cemetery were a group  
388 of itinerant and disadvantaged individuals who provided labor for the people buried in the  
389 relatively more prosperous R cemetery<sup>33</sup>. However, while social stratification is a common feature  
390 of complex landowning societies<sup>34,35</sup>, the presence of a semi-nomadic, landless underclass in  
391 Christian Period Nubian society has been described as a “wholly unexpected possibility” for which  
392 there is “neither textual evidence nor archaeological evidence from other sites to support such an  
393 interpretation”<sup>6</sup>. In this work, we divide the individuals from the R and S cemeteries into two  
394 cemetery groups when it is necessary to carry out analyses that investigate potential differences  
395 between the people buried in each cemetery at Kulubnarti.

396  
397  
398  
399  
400  
401  
402

## 403 **Supplementary Note 2 – Radiocarbon Dating**

404

405 Radiocarbon dating was performed at the Center for Applied Isotope Studies (CAIS), University  
406 of Georgia (USA) for 29 individuals that yielded genome-wide data. Collagen was extracted  
407 following the protocol in ref.<sup>36</sup>, modified as described here. A sub-sample of bone was removed  
408 using a Dremel tool outfitted with a diamond cutting wafer. Surface contamination was removed  
409 from the sub-sample using a scalpel and wire-bristle brush; the sub-sample was simultaneously  
410 reduced to smaller fragments (approximately 3–5mm in size). These small fragments were  
411 demineralized in cold (4°C) 1N HCl for 24 hours, the acid was decanted, and demineralized  
412 fragments of bone were rinsed three times with ultrapure water (MilliQ). The bone fragments were  
413 then treated with 0.1M NaOH to dissolve and remove humic acids, followed by a series of ultrapure  
414 water rinses. Atmospheric CO<sub>2</sub> was eliminated through the rinsing of bone fragments with cold  
415 1N HCl. The fragments were then rinsed again in ultrapure water to ~ pH 4 (slightly acidic) and  
416 heated at 80°C for 8 hours. The solution was subsequently filtered through a glass fiber filter,  
417 isolating the total acid insoluble fraction (“collagen”), which was then freeze-dried. A ~5mg sub-  
418 sample of collagen was combusted at 575°C in an evacuated and sealed Pyrex tube in the presence  
419 of CuO, producing CO<sub>2</sub>. The CO<sub>2</sub> sample was cryogenically purified from the other reaction  
420 products and catalytically converted to graphite following the method of ref.<sup>37</sup>. Graphite <sup>14</sup>C/<sup>13</sup>C  
421 ratios were measured using the 0.5 MeV accelerator mass spectrometer (AMS) housed at CAIS.  
422 Sample ratios were compared to the ratio measured from the Oxalic Acid I standard (NBS SRM  
423 4990). All results are presented as percent Modern Carbon (pMC). The quoted uncalibrated dates  
424 are given in radiocarbon years before 1950 (years BP), using a <sup>14</sup>C half-life of 5568 years. The  
425 date has been corrected for isotope fractionation using the δ<sup>13</sup>C value measured by EA-IRMS.  
426 Uncalibrated conventional dates are presented in Supplementary Table 1.

427

428 **Bayesian chronological modeling.** Bayesian chronological modeling employed the OxCal<sup>38</sup>  
429 software version 4.4 and the IntCal20<sup>39</sup> calibration curve. We use capitalized forms of words to  
430 refer to OxCal command language terminology (i.e., Sequence, Phase, Boundary, Interval). The  
431 chronological model is expressed in terms of Sequences, Phases, and Boundaries. A Sequence is  
432 a group of events or parameters that occurred in a specific order in relation to one another. A Phase  
433 is an unordered group of events or parameters. Boundaries are used to define the boundary of a  
434 group of events, e.g., the start or end of a Phase<sup>38</sup>. We employed the minimum of assumptions in

435 constructing the chronological model. The <sup>14</sup>C data from each cemetery was modeled as an  
436 independent Phase with start and end Boundaries. Collagen yields for all individuals were  
437 acceptable (>1%); due to the possibility of contamination as indicated by some aberrant C:N ratios,  
438 we applied the General Outlier Model to account for and down-weight potential outliers due to  
439 contamination or measurement error, applying a prior probability of 5% for each sample being an  
440 outlier. We made no assumptions regarding the relative chronological relationships within or  
441 between the two Phases; each Phase is bracketed by a start and end Boundary within an  
442 independent Sequence:

```
443  
444  
445 Plot()  
446 {  
447   Curve("IntCal20","IntCal20.14c");  
448   Outlier_Model("General",T(5),U(0,4),"t");  
449   Sequence()  
450   {  
451     Boundary("Start of Cemetery R");  
452     Phase("Cemetery R")  
453     {  
454       R_Date("R101", 1270, 22)  
455       {  
456         Outlier(.05);  
457       };  
458       R_Date("R124", 1270, 22)  
459       {  
460         Outlier(.05);  
461       };  
462       R_Date("R152", 1220, 22)  
463       {  
464         Outlier(.05);  
465       };  
466       R_Date("R169", 1170, 22)  
467       {  
468         Outlier(.05);  
469       };  
470       R_Date("R181", 1230, 22)  
471       {  
472         Outlier(.05);  
473       };  
474       R_Date("R182", 1240, 22)  
475       {  
476         Outlier(.05);
```

```

477 };
478 R_Date("R186", 1170, 22)
479 {
480   Outlier(.05);
481 };
482 R_Date("R196", 1080, 23)
483 {
484   Outlier(.05);
485 };
486 R_Date("R201", 1140, 22)
487 {
488   Outlier(.05);
489 };
490 R_Date("R202", 1180, 22)
491 {
492   Outlier(.05);
493 };
494 R_Date("R5", 1190, 22)
495 {
496   Outlier(.05);
497 };
498 R_Date("R59", 1220, 22)
499 {
500   Outlier(.05);
501 };
502 R_Date("R79", 1260, 22)
503 {
504   Outlier(.05);
505 };
506 R_Date("R93", 1210, 22)
507 {
508   Outlier(.05);
509 };
510 Interval("Duration of Cemetery R");
511 };
512 Boundary("End of Cemetery R");
513 };
514 Sequence()
515 {
516   Boundary("Start of Cemetery S");
517   Phase("Cemetery S")
518   {
519     R_Date("S133", 1210, 22)
520     {
521       Outlier(.05);
522     };

```

```
523 R_Date("S149", 1240, 22)
524 {
525   Outlier(.05);
526 };
527 R_Date("S159", 1190, 22)
528 {
529   Outlier(.05);
530 };
531 R_Date("S17", 1240, 22)
532 {
533   Outlier(.05);
534 };
535 R_Date("S198", 1180, 24)
536 {
537   Outlier(.05);
538 };
539 R_Date("S208", 1080, 22)
540 {
541   Outlier(.05);
542 };
543 R_Date("S27", 1150, 23)
544 {
545   Outlier(.05);
546 };
547 R_Date("S33", 1090, 22)
548 {
549   Outlier(.05);
550 };
551 R_Date("S50", 1220, 22)
552 {
553   Outlier(.05);
554 };
555 R_Date("S68a", 1200, 22)
556 {
557   Outlier(.05);
558 };
559 R_Date("S73", 1270, 22)
560 {
561   Outlier(.05);
562 };
563 R_Date("S79", 1320, 22)
564 {
565   Outlier(.05);
566 };
567 R_Date("S81", 1210, 22)
568 {
```

```

569     Outlier(.05);
570 };
571 R_Date("S87", 1260, 22)
572 {
573     Outlier(.05);
574 };
575 R_Date("S89", 1320, 20)
576 {
577     Outlier(.05);
578 };
579 Interval("Duration of Cemetery S");
580 };
581 Boundary("End of Cemetery S");
582 };
583 };
584

```

585 OxCal calculates a posterior Probability Density Function (PDF) for each of these elements. We  
586 utilized the Interval command to determine the length of time in calendar years of each cemetery  
587 represented by a Phase in the model. An agreement index is calculated for each dated item (“A”  
588 values), as well as for the model as a whole (“A<sub>model</sub>”), with  $A \geq 60$  considered to be the threshold  
589 for acceptable agreement<sup>38</sup>. In Supplementary Fig. 1, we provide individual <sup>14</sup>C dates. In this  
590 figure, the un-modeled calibrated date probabilities are indicated by the light gray distributions;  
591 the modeled (posterior) probabilities are shown by the dark gray distributions. The lines under the  
592 modelled distributions indicate the 68.3% highest posterior density (hpd) and 95.4% hpd ranges,  
593 the former of which are referred to in the text. In Fig. 1c, we present the modeled start and end  
594 dates (top) and duration of use (bottom) of the R and S cemeteries.

```

595
596
597
598
599
600
601
602
603
604
605
606
607
608
609

```

## 610 **Supplementary Note 3 – Genetic relatedness and Consanguinity**

611

### 612 **Genetic relatedness**

613 We looked for genetic relatedness between all individuals in our study following the method  
614 published in ref.<sup>2</sup>. This method compares the mean mismatch of all autosomal SNPs with at least  
615 one sequencing read between individuals (selecting at random one read if coverage is greater than  
616 one at a particular position for a given individual). The mismatch rate is used to estimate a  
617 relatedness coefficient ( $r$ ), which informs about the degree of relatedness between two individuals.  
618 This method is specifically applicable for estimating relatedness from haploid SNP data (common  
619 in ancient DNA analysis) and can accurately provide estimates of genetic relatedness up to third-  
620 /fourth-degree relatives.

621 We identify 33 individuals from Kulubnarti who share 28 genetic relationships up to the  
622 third/fourth degree (Supplementary Table 2). This included four pairs of first-degree relatives, nine  
623 pairs of second-degree relatives, 13 pairs of third-/fourth-degree relatives, and two pairs of  
624 relatives of an unknown relationship (in the latter case, the proportion of overlapping SNPs was  
625 used to infer that the individuals were related, although the low coverage precluded our ability to  
626 determine the exact degree of their relationship).

627 Particularly interesting in the context of two plausibly socially-stratified contemporaneous burial  
628 grounds at Kulubnarti (see Supplementary Note 1) is the identification of 7 inter-cemetery relative  
629 pairs out of the 28 total relative pairs. While there was enrichment of very close relative pairs  
630 buried in the same cemetery versus in different cemeteries (see Table 1 in main manuscript), we  
631 were surprised to identify any cross-cemetery relatives based on the hypothesis of a social system  
632 at Kulubnarti that may have restricted inter-group mating. Instead, we find that there was more  
633 likely to be fluidity between groups and, as such, that any system of social division did not prevent  
634 gene flow. While genetic data allows us to assess the degree of biological relatedness between two  
635 individuals, it does not enable us to ascribe the social concept of “kin” onto this assessment; as  
636 such, we cannot speak to the social relationship between any two individuals (whether buried in  
637 the same cemetery or in different cemeteries). However, with no archaeological evidence of cross-  
638 cemetery relative pairs at Kulubnarti, the ancient DNA data revealed a previously unknown aspect  
639 of social organization at this site. Future research at more sites in Nubia, from both the Christian



640 Period and other eras, will help to further elucidate principles of social organization in ancient  
641 Nubia.

642  
643 **Consanguinity**

644 We identified Runs of Homozygosity (ROH) within the Kulubnarti Nubian individuals with  
645 sufficient coverage using the Python package *hapROH* (<https://test.pypi.org/project/hapROH/>)<sup>1</sup>.  
646 We used 5008 global haplotypes from the 1000 Genomes project haplotype panel<sup>40</sup> as the reference  
647 panel and applied this method to ancient individuals with a minimum coverage of 400,000 SNPs  
648 (n=9, all from the S cemetery) to identify ROH longer than 4 centiMorgan (cM) in the pseudo-  
649 haploid data. For each individual, we grouped the inferred ROH into length categories >4cM and  
650 >20cM. Large sums of long ROH (>20cM) evidence a close degree of relatedness of the target  
651 individual's parents (up to five generations ago), as recombination quickly breaks up blocks back  
652 in time, making this signal independent of demographic processes occurring in the deeper past. In  
653 contrast, an abundance of shorter ROH signals background parental relatedness and restricted  
654 mating pools. We report the total sum ROH in these length bins for each individual with sufficient  
655 coverage in Supplementary Table 3 and visualize the size and amount of ROH for all individuals  
656 in Supplementary Fig. 2.

657 Nubia currently has a relatively high rate of consanguinity, characterized by double-first cousin,  
658 first cousin, and second cousin marriage<sup>41-43</sup>. It has been suggested that unions between close  
659 relatives (with several taboos, including brother-sister, uncle-niece, and aunt-nephew) have been  
660 common among Egyptians since the time of the Pharaohs, and that cousin marriages were preferred  
661 in Nubians as well, as they ensure the patrilineal system of inheritance<sup>42</sup>. However, we find that  
662 only a single individual (I6336/S27, a male who died at approximately nine months old) out of the  
663 nine analyzed has closely related parents as indicated by a total of ~160cM ROH in blocks >4cM  
664 of with over half of it in segments >20cM. In fact, this individual has an ROH block ~60cM on  
665 Chromosome 10 (Supplementary Fig. 3). The amount and length distribution of ROH is typical  
666 for offspring of first cousins or genetically equivalent related parents (the average is 220cM ROH  
667 with random variation around the average value, into which I6336 falls<sup>1</sup>).

668 Overall, analysis of ROH suggests that the mating pool of the Kulubnarti Nubians was not  
669 sufficiently closed to result in a consistently elevated rate of short ROH. Three individuals have  
670 no ROH longer than 4cM at all; three more individuals have no short ROH (4-8cM) which would

671 be expected for a long-standing small population. Of note is some intermediate ROH (8-20cM)  
672 present in three out of the nine analyzed individuals, suggesting some mating with a larger meta-  
673 population. This signal is consistent with our analysis of admixture dates and ancestry proportions  
674 that suggests that admixture at Kulubnarti was ongoing throughout the millennium leading up to  
675 and into the Christian Period. Furthermore, our detection that exogamous (here, West Eurasian-  
676 related) ancestry was disproportionately associated with female ancestors suggests that these  
677 connections could have been primarily female-mediated, and that a mobility system of female  
678 exogamy in addition to an inheritance system of patrilineal primogeniture might have been in place  
679 at Christian Period Kulubnarti.

680  
681  
682  
683  
684  
685  
686  
687  
688  
689  
690  
691  
692  
693  
694  
695  
696  
697  
698  
699  
700  
701  
702  
703  
704  
705  
706  
707  
708  
709

#### 710 **Supplementary Note 4. *qpAdm***

711  
712 We applied *qpAdm*<sup>44</sup> v.1210 from ADMIXTOOLS<sup>45</sup> with the option ‘allsnps: NO’ to identify the  
713 most likely sources of ancestry and proportions of ancestry in the Kulubnarti Nubians as well as  
714 for present-day Nubian groups. We interpreted models as fitting the data at  $p > 0.05$ , and used these  
715 models to estimate proportions of admixture.

716 First, we applied *qpAdm* to investigate if the pooled group of Kulubnarti Nubians (excluding  
717 outliers) could be modelled as a result of two-way admixture between Nilotic- and West Eurasian-  
718 related ancestry. We used Dinka as a proxy for Nilotic-related ancestry and sought to determine  
719 the most appropriate proxy source of West Eurasian-related ancestry, testing 21 geographically  
720 and temporally differentiated ancient West Eurasian populations (also including the predominantly  
721 West Eurasian-related *Egypt\_published*) as possible proxy sources. We began by using the ‘O9’  
722 reference set (present-day Mbuti, Onge, Chukchi, Karaitiana, Papuan, Han and ancient individuals  
723 Ust’-Ishim, MA1, and Kostenki14) that has been previously shown to effectively disentangle  
724 divergent strains of ancient West Eurasian-related ancestry (initially defined in ref.<sup>46</sup>; used also in  
725 ref.<sup>47</sup>). Results are in Supplementary Data 7.

726 Upon identifying three plausible solutions for model fit relative to the O9 reference set ( $p > 0.05$ ),  
727 we implemented a “model competition” approach where a group identified as a possible source  
728 relative to the O9 reference set is moved to the reference set if it is not currently being used as a  
729 source<sup>46,48</sup>. With this approach, we obtain a fitting model only when *Egypt\_published* is used as  
730 the West Eurasian-related proxy, but evaluate this as a non-ideal source for accurately estimating  
731 ancestry proportions in the Kulubnarti Nubians due to a non-trivial amount of Dinka-related  
732 ancestry also present in *Egypt\_published* (see Supplementary Data 7 for admixture proportions in  
733 *Egypt\_published*); in addition, despite the majority proportion of West Eurasian-ancestry in  
734 *Egypt\_published*, its geographic location reveals that while it is likely to be the proximal source  
735 of West Eurasian-related ancestry at Kulubnarti it is not the distal source of such ancestry. For  
736 these reasons, we removed *Egypt\_published* from our modelling and included the remaining two  
737 possible distal sources located in West Eurasia in our model competition approach. We repeated  
738 *qpAdm* until all but one admixture model was eliminated; this fitting model used Dinka and  
739 *Levant\_BAIA* as fitting proxy source to model the Kulubnarti Nubians relative to a reference set  
740 that included *Anatolia\_EBA* in addition to the O9 reference set populations.

741 Next, we estimated the proportions of Nilotic- and West Eurasian-related ancestry in each  
742 cemetery group (*Kulubnarti\_R* and *Kulubnarti\_S*) as well as each individual at Kulubnarti using  
743 this single fitting admixture model; results are presented in Supplementary Data 7 and  
744 Supplementary Data 8. We also used *qpAdm* to determine whether this same two-way admixture  
745 model fit three present-day Nubian populations or if the Kulubnarti Nubians could be used as a  
746 source for any of the present-day groups in a two-way model, but found that these models were  
747 poor fits for all present-day targets (Supplementary Data 7).

748  
749  
750  
751  
752  
753  
754  
755  
756  
757  
758  
759  
760  
761  
762  
763  
764  
765  
766  
767  
768  
769  
770  
771  
772  
773  
774  
775  
776  
777  
778  
779  
780  
781  
782  
783  
784  
785  
786  
787  
788  
789  
790

## 791 **Supplementary Note 5. Mitochondrial DNA analysis and haplogroup calling**

792

793 We determined mitochondrial (mtDNA) haplogroup for each individual in our dataset. We  
794 constructed a consensus sequence with samtools v.1.3.1. and bcftools v.1.10.2<sup>49</sup> using a majority  
795 rule and aligned mtDNA capture bam files to the *RSRS*<sup>50</sup>, restricting to reads with MAPQ  $\geq$  30 and  
796 base quality  $\geq$  20 and trimming two base pairs to remove deamination artifacts. Haplogroup calls  
797 were made using Haplogrep<sup>51</sup> Classify v.2.2.8 with the --rsrs flag. All haplogroups were then  
798 assessed as either primarily African- or West Eurasian-associated based on their geographic origin  
799 and primary distribution; haplogroup calls, corresponding mutations, and broad geographic  
800 groupings provided in Supplementary Data 12, with haplogroups and geographic groupings also  
801 depicted in Supplementary Fig. 6. We consider all uniparental data to supplement genome-wide  
802 data, which is more broadly informative of an individual's ancestry as it encompasses information  
803 from thousands of an individual's ancestors. Here we briefly discuss our mtDNA haplogroup  
804 findings; all references to mutations are based on PhyloTree<sup>52</sup> Build 17 with a focus on mutations  
805 included in the *RSRS* phylogeny<sup>50</sup>.

806 We found that 35 out of 63 individuals who were not first-degree relatives sharing a maternal  
807 lineage belonged to mtDNA haplogroups that originated and are presently distributed  
808 predominantly in West Eurasia, while the remaining 28 belonged to African associated  
809 haplogroups (all from macrohaplogroup L). In present-day populations, there is a decreased  
810 frequency of African mtDNA lineages (L lineages) with a south to north direction<sup>53</sup>; our finding  
811 that West Eurasian-associated lineages comprise the slight majority of mtDNA haplogroups at  
812 Kulubnarti is consistent with this previous work. There were seven different African-associated  
813 mtDNA haplogroups called for the 28 individuals with African-associated haplogroups at  
814 Kulubnarti.

815 Five individuals (three from the R cemetery and two from the S cemetery) belonged to haplogroup  
816 L0a1a1, all exhibiting the haplogroup's diagnostic 2759C mutation. Four out of the five  
817 individuals (two from the R cemetery and two from the S cemetery) show the same present  
818 mutations and three missing mutations, while one of these missing mutations (200G) is found to  
819 be present in the remaining individual (I19139/R103). All five individuals have an extra mutation  
820 relative to *RSRS* (8017T), while four of these five also have a second mutation (12738C), and two  
821 of these four have a third (9102T). L0a1a1 is a subclade of L0a that is estimated to have arisen

822 ~13,500 years ago in eastern Africa<sup>53-55</sup>. The presence of this haplogroup represents deep  
823 matrilineal ties to eastern Africa.

824 Three individuals (all from the S cemetery) belonged to L1b1a2a, with two individuals showing  
825 identical haplotypes. All individuals had the 16289G mutation that is diagnostic of this haplogroup  
826 and all had an extra mutation at 3357A that was not used in the haplogroup call. In addition, the  
827 individual with a different haplotype (I6334/S198) also showed extra mutations at 622T, 10073T,  
828 and 12483A. While the parent L1b haplogroup likely arose in West Africa where it is most frequent  
829 and diverse, the L1b1a2a lineage likely originated later in East Africa, where it is represented by  
830 three divergent sequences from Ethiopia<sup>56</sup>. Previous work has suggested that this haplogroup could  
831 have moved from East Africa toward Egypt (where it is also identified) down the Nile River<sup>56</sup>, a  
832 scenario consistent with its presence at Kulubnarti. No published sequences from Egypt or  
833 Ethiopia, or a Bedouin sequence from Israel<sup>57</sup> belonging to haplogroup L1b1a2a show the same  
834 unique extra mutations as those found among the L1b1a2a individuals from Kulubnarti.

835 Fifteen individuals (13 of them not first-degree relatives sharing an mtDNA lineage, three from  
836 the R cemetery and 10 from the S cemetery) belonged to haplogroup L2a1d1, the most common  
837 mtDNA haplogroup at Kulubnarti. All individuals had the same mutations missing and present;  
838 among those present were the five mutations diagnostic of this haplogroup. In addition, all  
839 individuals had the extra mutations of 189G, 1872C, 7444A, and 14569A, while a single individual  
840 (I6332/S159) also had the extra mutation 6261A. L2a1d1 is an Eastern African subclade of L2a1d  
841 that split from L2a1d2 ~10,600 years ago<sup>58</sup>. This haplogroup also represents a deep matrilineal  
842 connection to this region<sup>58</sup>. One individual from the R cemetery belonged to another L2a1 lineage,  
843 L2a1+143A+16189T (16192T), a branch of L2a1 that likely originated in East Africa. This branch  
844 has also been identified in some present-day from the Arabian Peninsula and the Levant in the L2  
845 phylogeny, supporting a long history of gene flow between East Africa and parts of West Eurasia<sup>54</sup>.

846 One individual from the R cemetery belonged to L3b1a2, exhibiting the diagnostic 9300A  
847 mutation. This lineage's parent haplogroup (L3b1) is more widespread in Central and West  
848 Africa<sup>59</sup>, but L3b1a2 has been previously identified in present-day individuals in Egypt<sup>60</sup>, Sudan<sup>61</sup>  
849 and Somalia<sup>59</sup>, suggesting that it is present in also in more easterly parts of Africa, although likely  
850 at low frequencies. One individual from the S cemetery belonged to L3f1a1, harboring the five  
851 mutations diagnostic of this haplogroup. Haplogroup L3f most likely arose in East Africa; it is

852 most frequent and most diverse in this region<sup>53,59</sup>. L3f1a is one of two main subclades of L3f1, and  
853 it is likely that this subclade originated in East Africa, where it is presently found in Somalia and  
854 Sudan<sup>59,61</sup>. The haplogroups from the L3 lineage identified at Kulubnarti again represent deep  
855 matrilineal ties to East Africa.

856 Four individuals (two from the R cemetery and two from the S cemetery) belonged to L5a1b; all  
857 individuals had the diagnostic 14668T and 14819C mutations and identical haplotypes. The rare  
858 L5 haplogroup has been observed at only low frequencies in eastern and into central Africa,  
859 including in Egypt, Sudan, Ethiopia, Kenya, Rwanda and Tanzania, as well as in the Mbuti  
860 Pygmies<sup>62-68</sup>. L5a1b is estimated to have arisen in East Africa 5,900-15,200 years ago<sup>50</sup>, and is  
861 today found primarily in Eastern Nilotic speakers<sup>69</sup>. Previous work<sup>57</sup> has identified a present-day  
862 Ethiopian as well as an individual from the Sara people of Chad as belonging to L5a1b; these  
863 individuals both harbored a TTC insertion between 456-459, which is missing in the four  
864 Kulubnarti Nubians belonging to this haplogroup. A Pastoral Neolithic individual from Hyrax Hill  
865 in Kenya dating to ~2300 years BP was also assessed as belonging to L5a1b<sup>70</sup>. Consistent with the  
866 other L lineages, this haplogroup reflects deep matrilineal ties to East Africa.

867 In addition to these African-associated mtDNA haplogroups, there were 11 different West  
868 Eurasian-associated mtDNA haplogroups represented in 35 individuals at Kulubnarti. While we  
869 consider these haplogroups to be West Eurasian-associated given their geographic origin, they  
870 were present in northeastern Africa (not only limited to the Nile Valley) possibly for thousands of  
871 years before the Christian Period<sup>70-75</sup>. For this reason, it is not possible to assess West Eurasian-  
872 related ancestry based on mtDNA haplogroup alone; instead, mitochondrial DNA can be used as  
873 a tool for exploring the deep matrilineal origins of the people living at Christian Period Kulubnarti  
874 and for investigating patterns of haplotype sharing within and among groups.

875 mtDNA haplogroup U has a predominant West/Central Eurasian geographic range with branches  
876 that also extend into Europe, the Near East, and North Africa<sup>76</sup>. The presence of haplogroup U  
877 lineages at Kulubnarti ultimately reflects the biological connections between West Eurasia and  
878 Egypt and Nubia established long before the Christian Period. One individual from the R cemetery  
879 belonged to U1a1, exhibiting the three diagnostic mutations of this haplogroup but also showing  
880 a number of extra mutations to *RSRS*, including 3865G, 6060G, 8544T, 10619T, 14980T, 16183C,  
881 and 16319A. U1a1 is predominantly found throughout the Near East and Caucasus, including in

882 people from Yemen, Turkey, and Georgia<sup>77,78</sup>; U1a1 has also been identified in an ancient  
883 individual from Egypt dating ~350-200 calBCE<sup>79</sup>. Haplogroup U3, although also primarily found  
884 in the Near East and Caucasus, is another one of the branches of macrohaplogroup U that also has  
885 a presence in Africa<sup>76</sup>. U3 has been found at relatively low frequencies in present-day Egyptians,  
886 Nubians, and Nile Valley groups<sup>62,66</sup>. One individual from the R cemetery belonged to haplogroup  
887 U3b, exhibiting all four diagnostic mutations, and harboring a number of extra mutations including  
888 464C, 2272T, 8526C, 9305A, 10909C, 11137C, and 16104T. Haplogroup U3b has previously been  
889 identified in geographic proximity to Nubia; specifically, it was called for two ancient Egyptians  
890 dating ~750-500 calBCE and ~45 calBCE – 5 calCE<sup>79</sup>. Both U1a1 and U3b have also been  
891 previously identified in Bronze Age individuals from Israel and Jordan<sup>80</sup>, providing possible  
892 evidence of an ancient matrilineal connection to the people living in the Levant, consistent with  
893 the genome-wide data reported in this work.

894 Ten individuals (seven from the S cemetery and three from the R cemetery) belong to haplogroup  
895 U5b2b5. All individuals have the same three missing mutations, the same mutations present  
896 (including the two mutations diagnostic of this haplogroup), and the same three extra mutations  
897 (13980A, 15226G, 15538T); this suggests that there is plausibly an unidentified sub-lineage of  
898 U5b2b5. U5 is known for being one of the most ancient mtDNA haplogroups in Europe<sup>81,82</sup>,  
899 primarily identified in Mesolithic hunter-gatherers<sup>83,84</sup>, and U5b2 has been shown to be the most  
900 ancient sub-haplogroup of U5b<sup>85</sup>. Haplogroup U5b2b5 was called for a 4,000-year-old mummy  
901 from Egypt<sup>86</sup>; this individual also shared the extra 15538T mutation called for the Kulubnarti  
902 Nubians, suggesting that it is possible that this haplogroup was spread into Nubia via Egypt.

903 One individual belonged to T1a7, exhibiting the three diagnostic mutations of this haplogroup and  
904 also exhibiting extra mutations including 319C, 5201C, 5460A, and 16172C. Haplogroup T has  
905 an unambiguous Near Eastern origin<sup>81</sup>, and some of its lineages have been found at different  
906 frequencies in populations throughout Egypt and the Nile Valley<sup>60,62,87</sup>. The T1a lineage split  
907 ~17,000 years ago, and several individuals from Egypt<sup>60</sup> as well as throughout the Near East,  
908 including Israel and Iraq<sup>88</sup>, have been shown to have the mutations consistent with T1a7; more  
909 recently, present-day individuals from Lebanon have been shown to belong to T1a7<sup>89</sup>. Possibly of  
910 direct relevance is the detection of the T1a7 lineage in ancient Egypt dating ~800 BCE–1 CE<sup>79,90</sup>,  
911 which plausibly could have been spread southward into Nubia prior to the Christian Period.



912 One individual from the R cemetery belonged to R0a1a, harboring the four diagnostic mutations  
913 of this haplogroup as well as additional mutations at 8527G, 9631C, 11167G, and 15779C.  
914 Haplogroup R0a is most frequent in the Arabian Peninsula and Horn of Africa; previous work has  
915 proposed that the deep presence of R0a in Arabia highlights at least one Pleistocene glacial  
916 refugium on the Red Sea plains, and that the dispersal of this haplogroup into East Africa occurred  
917 at the end of the Late Glacial<sup>91</sup>, giving this haplogroup a deep presence in Africa as well as on the  
918 Arabian Peninsula (as well as throughout other parts of West Eurasia). In particular, R0a1a is one  
919 of the known major expansion lineages in R0a; however, the vast majority of African R0a lineages  
920 fall within R0a2<sup>91</sup>. While R0a1a is more represented on the Arabian Peninsula<sup>92</sup>, it has previously  
921 been identified in Egypt, including in two individuals reported in ref.<sup>79</sup>, one dating ~360–210 BCE  
922 and the other ~40 BCE–15 CE. The presence of this lineage at Kulubnarti likely represents deep  
923 connections between the Arabian Peninsula and East Africa that resulted in genetic exchange long  
924 before the Christian Period.

925 One individual from the S cemetery belonged to N1a1a. This haplogroup has eight diagnostic  
926 mutations, and this individual harbored seven of them, missing the 16147G transversion.  
927 Additional mutations included 10586A, 10768G, 13146T, 16147A, and 16245T. N1a originated  
928 in the Near East<sup>81</sup> and is now widely distributed across the Near East, Europe, northeast Africa,  
929 and into Central Asia. N1a displays deep diversity in eastern Africa as well as the southern part of  
930 the Arabian Peninsula and probably reflects ancient gene flow (plausibly dating to the Late Glacial  
931 period)<sup>93</sup>; in northeast Africa, the N1a haplogroup is primarily found in groups speaking Afro-  
932 Asiatic languages who have substantial amounts of ancestry with an ultimate origin in West  
933 Eurasia. Haplogroup N1a1a in the Horn of Africa is believed to have also spread in the Late  
934 Glacial<sup>93</sup>, suggesting its presence in northeast Africa for thousands of years before the Christian  
935 Period.

936 Three individuals (two from the S cemetery and one from the R cemetery) belonged to N1b1a2.  
937 All exhibited the diagnostic 4904T mutation, and the two individuals from the S cemetery shared  
938 the same haplotype. In modern populations, haplogroup N1b1 is found primarily in the Near East,  
939 with branches in Europe and North Africa<sup>93</sup>. Haplogroup N1b1a has been previously identified at  
940 the Anatolian Ceramic Neolithic site of Barcin (6500-6200 BCE)<sup>94</sup>, while N1b1a2 has been  
941 previously found in Bronze Age Israel and Jordan<sup>80</sup>, again providing evidence of a West Eurasian-  
942 associated matrilineal connection as also shown through genome-wide data.

943 One individual from the R cemetery belonged to K1a19, harboring the 12338C mutation diagnostic  
944 of this haplogroup and additional mutations including 5563A and 15929G. Haplogroup K is most  
945 often associated with Neolithic farmers<sup>95</sup>; it spread and diversified during the Neolithic expansion  
946 into Europe, and it is also found in Central Asia and in the Horn of Africa. K1a19 is a rare  
947 haplogroup<sup>96</sup> that is reported to have origins in the Near East, though it is also spread throughout  
948 other regions, including southern Europe and Iran<sup>97</sup>.

949 One individual from the S cemetery belonged to HV13a, although this individual did not have one  
950 of the seven diagnostic mutations of this haplogroup (9027T); an additional mutation at 8420G  
951 was also observed. While haplogroup HV has a likely Near Eastern origin<sup>98</sup>, it was detected at  
952 ~14% frequency in a small population from the Egyptian Western Desert (west of the Nile River),  
953 providing direct genetic evidence of a strong Near Eastern genetic input into this region that dates  
954 to the Neolithic<sup>60</sup>. Haplogroup c has been shown to have a Near Eastern origin<sup>98</sup>; to our knowledge,  
955 this specific lineage has not been detected in Africa.

956 Two individuals (one from the R cemetery and one from the S cemetery) belonged to haplogroup  
957 J2a2e, harboring both of the diagnostic mutations (10658A, 14364A) of this haplogroup. These  
958 individuals have the same haplotype, which includes the additional mutations 9276A, 14016A,  
959 and 16362C. Haplogroup J2 originated in the Near East<sup>88</sup>, with the J2a lineage estimated to be  
960 between ~20,000 and 28,000 years old<sup>50</sup>. The J2a2e haplogroup was also called for two ancient  
961 Egyptian individuals reported in ref.<sup>79</sup> (also see ref.<sup>90</sup>), one dating to ~350–200 cal BCE and the  
962 other to ~80–130 CE, while a present-day Egyptian individual belonging to J2a2e was also shown  
963 to have the same three additional mutations as seen in the Kulubnarti Nubians<sup>99</sup>. As such, while  
964 this haplogroup originates in the Near East, it is more likely to reflect biological connections  
965 between Nubia and Egypt.

966 Fourteen individuals (eight from the R cemetery and six from the S cemetery, 13 who were not  
967 first-degree relatives sharing a mtDNA lineage) were assigned as belonging to haplogroup H2a.  
968 To our knowledge, haplogroup H2a has not previously been found in any ancient African  
969 individuals. Macrohaplogroup H is the predominant West Eurasian haplogroup that comprises  
970 nearly a half of the European mtDNA pool and decreases to frequencies ~10–30% in the Near East  
971 and Caucasus<sup>81</sup>; H2a is one of the sub-haplogroups of this lineage that exhibits a distinct  
972 phylogeographic pattern<sup>100</sup>. The spread of H2a extends to Central Asia<sup>100</sup> and it is more often

973 associated with eastern European affinity than western European affinity<sup>101-103</sup>. Evidence for H2a  
974 in Africa is sparse: it has been reported for a small number of Tunisian Berbers and other North  
975 Africans<sup>104</sup>, but otherwise appears to be largely absent in African individuals.

976 All individuals assigned as belonging to H2a had the diagnostic 4769A mutation for this  
977 haplogroup and all had three additional mutations (15784C, 16210G, and 16224C). Particularly  
978 interesting are the latter two additional mutations: 16210G is not reported in PhyloTree 17, while  
979 16224C is part of PhyloTree 17 but is not part of the H2a haplogroup. This raises the possibility  
980 that these individuals were erroneously assigned to H2a based on the presently-available version  
981 of PhyloTree, but were actually part of a now extinct or previously undocumented mtDNA  
982 haplogroup.

983  
984  
985  
986  
987  
988  
989  
990  
991  
992  
993  
994  
995  
996  
997  
998  
999  
1000  
1001  
1002  
1003  
1004  
1005  
1006  
1007  
1008  
1009  
1010  
1011

1012 **Supplementary References**

- 1013
- 1014 1. Ringbauer H, Novembre J, Steinrücken M. Detecting runs of homozygosity from low-  
1015 coverage ancient DNA. *bioRxiv*, 2020.2005.2031.126912 (2020).
- 1016
- 1017 2. Olalde I, *et al.* The genomic history of the Iberian Peninsula over the past 8000 years.  
1018 *Science* **363**, 1230-1234 (2019).
- 1019
- 1020 3. Adams WY. *Kulubnarti I: The Architectural Remains*. Program for Cultural Resource  
1021 Assessment, University of Kentucky (1996).
- 1022
- 1023 4. Adams WY. *Nubia: Corridor to Africa*. Princeton University Press (1977).
- 1024
- 1025 5. Adams WY, Adams NK. *Kulubnarti II: The Artifactual Remains*. Sudan Archaeological  
1026 Research Society (1998).
- 1027
- 1028 6. Adams WY, Van Gerven D, Guise D. *Kulubnarti III: The Cemeteries*. Archaeopress  
1029 (1999).
- 1030
- 1031 7. Welsby D. *The medieval kingdoms of Nubia: Pagans, Christians, and Muslims along the*  
1032 *Middle Nile*. The British Museum Press (2002).
- 1033
- 1034 8. Thurmond AK, Stern RJ, Abdelsalam MG, Nielsen KC, Abdeen MM, Hinz E. The  
1035 Nubian Swell. *Journal of African Earth Sciences* **39**, 401-407 (2004).
- 1036
- 1037 9. Van Gerven D, Sheridan SG, Adams WY. The health and nutrition of a Medieval Nubian  
1038 population. *American Anthropologist* **97**, 468-480 (1995).
- 1039
- 1040 10. Dafalla H. LAND ECONOMY OF OLD HALFA. *Sudan Notes and Records* **50**, 63-74  
1041 (1969).
- 1042
- 1043 11. Turner BL, Edwards JL, Quinn EA, Kingston JD, Van Gerven DP. Age-related variation  
1044 in isotopic indicators of diet at medieval Kulubnarti, Sudanese Nubia. *International*  
1045 *Journal of Osteoarchaeology* **17**, 1-25 (2007).
- 1046
- 1047 12. Sandberg PA, Sponheimer M, Lee-Thorp J, Van Gerven D. Intra-tooth stable isotope  
1048 analysis of dentine: A step toward addressing selective mortality in the reconstruction of  
1049 life history in the archaeological record. *American Journal of Physical Anthropology* **155**,  
1050 281-293 (2014).
- 1051
- 1052 13. Basha WA, Lamb AL, Zaki ME, Kandeel WA, Fares NH, Chamberlain AT. Dietary  
1053 seasonal variations in the Medieval Nubian population of Kulubnarti as indicated by the  
1054 stable isotope composition of hair. *Journal of Archaeological Science: Reports* **18**, 161-  
1055 168 (2018).
- 1056

- 1057 14. Sandford MK, Kissling GE. Multivariate analyses of elemental hair concentrations from  
1058 a medieval Nubian population. *American Journal of Physical Anthropology* **95**, 41-52  
1059 (1994).  
1060
- 1061 15. Van Gerven DP, Sandford MK, Hummert JR. Mortality and culture change in Nubia's  
1062 Batn el Hajar. *Journal of Human Evolution* **10**, 395-408 (1981).  
1063
- 1064 16. Sandberg PA, Van Gerven DP. "Canaries in the mineshaft": the children of Kulubnarti.  
1065 In: *New Directions in Biocultural Anthropology* (eds Zuckerman MK, Martin DL). John  
1066 Wiley & Sons, Inc (2016).  
1067
- 1068 17. Ubelaker DH. *Human Skeletal Remains: Excavation, Analysis, Interpretation*, 2nd edn.  
1069 Taraxacum (1989).  
1070
- 1071 18. Scheuer L, Black S. Skeletal Development and Ageing In: *Developmental Juvenile*  
1072 *Osteology* (eds Scheuer L, Black S). Academic Press (2000).  
1073
- 1074 19. Buikstra JE, Ubelaker DH. *Standards for data collection from human skeletal remains:*  
1075 *proceedings of a seminar at the Field Museum of Natural History*. Arkansas  
1076 Archaeological Survey (1994).  
1077
- 1078 20. Meindl RS, Lovejoy CO, Mensforth RP, Walker RA. A revised method of age  
1079 determination using the os pubis, with a review and tests of accuracy of other current  
1080 methods of pubic symphyseal aging. *American Journal of Physical Anthropology* **68**, 29-  
1081 45 (1985).  
1082
- 1083 21. Brooks S, Suchey JM. Skeletal age determination based on the os pubis: a comparison of  
1084 the Acsádi-Nemeskéri and Suchey-Brooks methods. *Human Evolution* **5**, 227-238 (1990).  
1085
- 1086 22. Katz D, Suchey JM. Age determination of the male os pubis. *American Journal of*  
1087 *Physical Anthropology* **69**, 427-435 (1986).  
1088
- 1089 23. Klales AR, Ousley SD, Vollner JM. A revised method of sexing the human innominate  
1090 using Phenice's nonmetric traits and statistical methods. *American Journal of Physical*  
1091 *Anthropology* **149**, 104-114 (2012).  
1092
- 1093 24. Phenice TW. A newly developed visual method of sexing the os pubis. *American Journal*  
1094 *of Physical Anthropology* **30**, 297-301 (1969).  
1095
- 1096 25. Acsádi G, Nemeskéri J. *History of human life span and mortality*. Akadémiai Kiadó  
1097 (1970).  
1098
- 1099 26. Spradley MK, Jantz RL. Sex estimation in forensic anthropology: skull versus postcranial  
1100 elements. *Journal of Forensic Sciences* **56**, 289-296 (2011).  
1101

- 1102 27. Van Gerven DP. The contribution of time and local geography to craniofacial variation in  
1103 Nubia's *Batn el Hajar*. *American Journal of Physical Anthropology* **59**, 307-316 (1982).  
1104
- 1105 28. Godde K. A new analysis interpreting Nilotic relationships and peopling of the Nile  
1106 Valley. *HOMO* **69**, 147-157 (2018).  
1107
- 1108 29. Greene DL. Discrete dental variations and biological distances of Nubian populations.  
1109 *American Journal of Physical Anthropology* **58**, 75-79 (1982).  
1110
- 1111 30. Mittler DM, Van Gerven DP. Developmental, diachronic, and demographic analysis of  
1112 cribra orbitalia in the medieval Christian populations of Kulubnarti. *American Journal of*  
1113 *Physical Anthropology* **93**, 287-297 (1994).  
1114
- 1115 31. Van Gerven DP, Beck R, Hummert JR. Patterns of enamel hypoplasia in two medieval  
1116 populations from Nubia's *Batn el Hajar*. *American Journal of Physical Anthropology* **82**,  
1117 413-420 (1990).  
1118
- 1119 32. Moore JA, Swedlund AC, Armelagos GJ. The Use of Life Tables in Paleodemography.  
1120 *Memoirs of the Society for American Archaeology*, 57-70 (1975).  
1121
- 1122 33. Adams WY, Adams NK. The Kulubnarti Underclass. In: *Cahiers de Recherches de*  
1123 *l'Institut de Papyrologie et d'Égyptologie de Lille* (ed Gratien B) (2006).  
1124
- 1125 34. Davis K, Moore WE. Some principles of stratification. *American Sociological Review* **10**,  
1126 242-249 (1945).  
1127
- 1128 35. Hayden B. Richman, Poorman, Beggarman, Chief: The Dynamics of Social Inequality.  
1129 In: *Archaeology at the Millennium* (eds Feinman GM, Price TD). Springer (2001).  
1130
- 1131 36. Longin R. New method of collagen extraction for radiocarbon dating. *Nature* **230**, 241-  
1132 242 (1971).  
1133
- 1134 37. Vogel JS, Southon JR, Nelson D, Brown TA. Performance of catalytically condensed  
1135 carbon for use in accelerator mass spectrometry. *Nuclear Instruments and Methods in*  
1136 *Physics Research Section B: Beam Interactions with Materials and Atoms* **5**, 289-293  
1137 (1984).  
1138
- 1139 38. Bronk Ramsey C. Radiocarbon calibration and analysis of stratigraphy: the OxCal  
1140 program. *Radiocarbon* **37**, 425-430 (1995).  
1141
- 1142 39. Reimer PJ, *et al.* The IntCal20 Northern Hemisphere radiocarbon age calibration curve  
1143 (0–55 cal kBP). *Radiocarbon* **62**, 725-757 (2020).  
1144
- 1145 40. The 1000 Genomes Project Consortium. A global reference for human genetic variation.  
1146 *Nature* **526**, 68-74 (2015).  
1147

- 1148 41. Hussien F. Endogamy in Egyptian Nubia. *Journal of Biosocial Science* **3**, 251-257  
1149 (1971).  
1150
- 1151 42. Badr FM. Genetic Studies of Egyptian Nubian Populations: I. Frequency and Types of  
1152 Consanguineous Marriages. *Human Heredity* **22**, 387-398 (1972).  
1153
- 1154 43. Bittles AH. Empirical estimates of the global prevalence of consanguineous marriage in  
1155 contemporary societies. (1998).  
1156
- 1157 44. Haak W, *et al.* Massive migration from the steppe was a source for Indo-European  
1158 languages in Europe. *Nature* **522**, 207-211 (2015).  
1159
- 1160 45. Patterson N, *et al.* Ancient admixture in human history. *Genetics* **192**, 1065-1093 (2012).  
1161
- 1162 46. Lazaridis I, *et al.* Genomic insights into the origin of farming in the ancient Near East.  
1163 *Nature* **536**, 419-424 (2016).  
1164
- 1165 47. Harney É, *et al.* Ancient DNA from Chalcolithic Israel reveals the role of population  
1166 mixture in cultural transformation. *Nature Communications* **9**, 1-11 (2018).  
1167
- 1168 48. Narasimhan VM, *et al.* The formation of human populations in South and Central Asia.  
1169 *Science* **365**, eaat7487 (2019).  
1170
- 1171 49. Li H, *et al.* The sequence alignment/map format and SAMtools. *Bioinformatics* **25**, 2078-  
1172 2079 (2009).  
1173
- 1174 50. Behar Doron M, *et al.* A "Copernican" Reassessment of the Human Mitochondrial DNA  
1175 Tree from its Root. *The American Journal of Human Genetics* **90**, 675-684 (2012).  
1176
- 1177 51. Weissensteiner H, *et al.* HaploGrep 2: mitochondrial haplogroup classification in the era  
1178 of high-throughput sequencing. *Nucleic Acids Research* **44**, W58-W63 (2016).  
1179
- 1180 52. Van Oven M, Kayser M. Updated comprehensive phylogenetic tree of global human  
1181 mitochondrial DNA variation. *Human Mutation* **30**, E386-E394 (2009).  
1182
- 1183 53. Salas A, *et al.* The making of the African mtDNA landscape. *The American Journal of*  
1184 *Human Genetics* **71**, 1082-1111 (2002).  
1185
- 1186 54. Silva MS da. Phylogeography of mtDNA haplogroup L2. (University of Porto, 2014).  
1187
- 1188 55. Rito T, *et al.* A dispersal of Homo sapiens from southern to eastern Africa immediately  
1189 preceded the out-of-Africa migration. *Scientific Reports* **9**, 4728 (2019).  
1190
- 1191 56. Cerezo M, *et al.* Reconstructing ancient mitochondrial DNA links between Africa and  
1192 Europe. *Genome Research* **22**, 821-826 (2012).  
1193

- 1194 57. Behar DM, *et al.* The dawn of human matrilineal diversity. *The American Journal of*  
1195 *Human Genetics* **82**, 1130-1140 (2008).  
1196
- 1197 58. Silva M, *et al.* 60,000 years of interactions between Central and Eastern Africa  
1198 documented by major African mitochondrial haplogroup L2. *Scientific Reports* **5**, 1-13  
1199 (2015).  
1200
- 1201 59. Soares P, *et al.* The Expansion of mtDNA Haplogroup L3 within and out of Africa.  
1202 *Molecular Biology and Evolution* **29**, 915-927 (2012).  
1203
- 1204 60. Kujanová M, Pereira L, Fernandes V, Pereira JB, Černý V. Near Eastern Neolithic  
1205 genetic input in a small oasis of the Egyptian Western Desert. *American Journal of*  
1206 *Physical Anthropology* **140**, 336-346 (2009).  
1207
- 1208 61. Cabrera VM, Marrero P, Abu-Amero KK, Larruga JM. Carriers of mitochondrial DNA  
1209 macrohaplogroup L3 basal lineages migrated back to Africa from Asia around 70,000  
1210 years ago. *BMC Evolutionary Biology* **18**, 1-16 (2018).  
1211
- 1212 62. Krings M, *et al.* mtDNA analysis of Nile River Valley populations: A genetic corridor or  
1213 a barrier to migration? *The American Journal of Human Genetics* **64**, 1166-1176 (1999).  
1214
- 1215 63. Brandstätter A, *et al.* Mitochondrial DNA control region sequences from Nairobi  
1216 (Kenya): inferring phylogenetic parameters for the establishment of a forensic database.  
1217 *International Journal of Legal Medicine* **118**, 294-306 (2004).  
1218
- 1219 64. Kivisild T, *et al.* Ethiopian mitochondrial DNA heritage: tracking gene flow across and  
1220 around the gate of tears. *The American Journal of Human Genetics* **75**, 752-770 (2004).  
1221
- 1222 65. Kivisild T, *et al.* The role of selection in the evolution of human mitochondrial genomes.  
1223 *Genetics* **172**, 373-387 (2006).  
1224
- 1225 66. Stevanovitch A, *et al.* Mitochondrial DNA sequence diversity in a sedentary population  
1226 from Egypt. *Annals of Human Genetics* **68**, 23-39 (2004).  
1227
- 1228 67. Tishkoff SA, *et al.* Convergent adaptation of human lactase persistence in Africa and  
1229 Europe. *Nature Genetics* **39**, 31-40 (2007).  
1230
- 1231 68. Castri L, Garagnani P, Useli A, Pettener D, Luiselli D. Kenyan crossroads: migration and  
1232 gene flow in six ethnic groups from Eastern Africa. *Journal of Anthropological Sciences*  
1233 **86**, 189-192 (2008).  
1234
- 1235 69. Gomes V, *et al.* Mosaic maternal ancestry in the Great Lakes region of East Africa.  
1236 *Human Genetics* **134**, 1013-1027 (2015).  
1237



- 1238 70. Wang K, *et al.* Ancient genomes reveal complex patterns of population movement,  
1239 interaction, and replacement in sub-Saharan Africa. *Science Advances* **6**, eaaz0183  
1240 (2020).  
1241
- 1242 71. Pagani L, *et al.* Ethiopian Genetic Diversity Reveals Linguistic Stratification and  
1243 Complex Influences on the Ethiopian Gene Pool. *The American Journal of Human*  
1244 *Genetics* **91**, 83-96 (2012).  
1245
- 1246 72. Pickrell JK, *et al.* Ancient west Eurasian ancestry in southern and eastern Africa.  
1247 *Proceedings of the National Academy of Sciences* **111**, 2632-2637 (2014).  
1248
- 1249 73. Gallego-Llorente M, *et al.* Ancient Ethiopian genome reveals extensive Eurasian  
1250 admixture in Eastern Africa. *Science* **350**, 820-822 (2015).  
1251
- 1252 74. Busby GB, *et al.* Admixture into and within sub-Saharan Africa. *Elife* **5**, e15266 (2016).  
1253
- 1254 75. Prendergast ME, *et al.* Ancient DNA reveals a multistep spread of the first herders into  
1255 sub-Saharan Africa. *Science* **365**, eaaw6275 (2019).  
1256
- 1257 76. Larruga JM, Marrero P, Abu-Amro KK, Golubenko MV, Cabrera VM. Carriers of  
1258 mitochondrial DNA macrohaplogroup R colonized Eurasia and Australasia from a  
1259 southeast Asia core area. *BMC Evolutionary Biology* **17**, 1-15 (2017).  
1260
- 1261 77. Schönberg A, Theunert C, Li M, Stoneking M, Nasidze I. High-throughput sequencing of  
1262 complete human mtDNA genomes from the Caucasus and West Asia: high diversity and  
1263 demographic inferences. *European Journal of Human Genetics* **19**, 988-994 (2011).  
1264
- 1265 78. Matisoo-Smith EA, *et al.* A European Mitochondrial Haplotype Identified in Ancient  
1266 Phoenician Remains from Carthage, North Africa. *PLoS ONE* **11**, e0155046 (2016).  
1267
- 1268 79. Schuenemann VJ, *et al.* Ancient Egyptian mummy genomes suggest an increase of Sub-  
1269 Saharan African ancestry in post-Roman periods. *Nature Communications* **8**, 1-11  
1270 (2017).  
1271
- 1272 80. Agranat-Tamir L, *et al.* The Genomic History of the Bronze Age Southern Levant. *Cell*  
1273 **181**, 1146-1157 (2020).  
1274
- 1275 81. Richards M, *et al.* Tracing European founder lineages in the Near Eastern mtDNA pool.  
1276 *The American Journal of Human Genetics* **67**, 1251-1276 (2000).  
1277
- 1278 82. Soares P, *et al.* The archaeogenetics of Europe. *Current Biology* **20**, R174-R183 (2010).  
1279
- 1280 83. Bramanti B, *et al.* Genetic discontinuity between local hunter-gatherers and central  
1281 Europe's first farmers. *Science* **326**, 137-140 (2009).  
1282

- 1283 84. Malmström H, *et al.* Ancient DNA reveals lack of continuity between neolithic hunter-  
1284 gatherers and contemporary Scandinavians. *Current Biology* **19**, 1758-1762 (2009).  
1285
- 1286 85. Malyarchuk B, *et al.* The Peopling of Europe from the Mitochondrial Haplogroup U5  
1287 Perspective. *PLoS ONE* **5**, e10285 (2010).  
1288
- 1289 86. Loreille O, *et al.* Biological Sexing of a 4000-Year-Old Egyptian Mummy Head to  
1290 Assess the Potential of Nuclear DNA Recovery from the Most Damaged and Limited  
1291 Forensic Specimens. *Genes* **9**, 135 (2018).  
1292
- 1293 87. Rowold DJ, Luis JR, Terreros MC, Herrera RJ. Mitochondrial DNA geneflow indicates  
1294 preferred usage of the Levant Corridor over the Horn of Africa passageway. *Journal of*  
1295 *Human Genetics* **52**, 436-447 (2007).  
1296
- 1297 88. Pala M, *et al.* Mitochondrial DNA Signals of Late Glacial Recolonization of Europe from  
1298 Near Eastern Refugia. *The American Journal of Human Genetics* **90**, 915-924 (2012).  
1299
- 1300 89. Matisoo-Smith E, *et al.* Ancient mitogenomes of Phoenicians from Sardinia and  
1301 Lebanon: A story of settlement, integration, and female mobility. *PLoS ONE* **13**,  
1302 e0190169 (2018).  
1303
- 1304 90. Lalremruata A, *et al.* Molecular identification of falciparum malaria and human  
1305 tuberculosis co-infections in mummies from the Fayum depression (Lower Egypt). *PLoS*  
1306 *ONE* **8**, e60307 (2013).  
1307
- 1308 91. Gandini F, *et al.* Mapping human dispersals into the Horn of Africa from Arabian Ice  
1309 Age refugia using mitogenomes. *Scientific Reports* **6**, 25472-25472 (2016).  
1310
- 1311 92. Černý V, *et al.* Internal Diversification of Mitochondrial Haplogroup R0a Reveals Post-  
1312 Last Glacial Maximum Demographic Expansions in South Arabia. *Molecular Biology*  
1313 *and Evolution* **28**, 71-78 (2010).  
1314
- 1315 93. Fernandes V, *et al.* The Arabian Cradle: Mitochondrial Relicts of the First Steps along  
1316 the Southern Route out of Africa. *American Journal of Human Genetics* **90**, 347-355  
1317 (2012).  
1318
- 1319 94. Mathieson I, *et al.* Genome-wide patterns of selection in 230 ancient Eurasians. *Nature*  
1320 **528**, 499-503 (2015).  
1321
- 1322 95. Isern N, Fort J, de Rioja VL. The ancient cline of haplogroup K implies that the Neolithic  
1323 transition in Europe was mainly demic. *Scientific Reports* **7**, 11229 (2017).  
1324
- 1325 96. Coia V, *et al.* Whole mitochondrial DNA sequencing in Alpine populations and the  
1326 genetic history of the Neolithic Tyrolean Iceman. *Scientific Reports* **6**, 18932-18932  
1327 (2016).  
1328

- 1329 97. Costa MD, *et al.* A substantial prehistoric European ancestry amongst Ashkenazi  
1330 maternal lineages. *Nature Communications* **4**, (2013).  
1331
- 1332 98. Derenko M, *et al.* Western Eurasian ancestry in modern Siberians based on mitogenomic  
1333 data. *BMC Evolutionary Biology* **14**, 217 (2014).  
1334
- 1335 99. Font-Porterias N, *et al.* The genetic landscape of Mediterranean North African  
1336 populations through complete mtDNA sequences. *Annals of Human Biology* **45**, 98-104  
1337 (2018).  
1338
- 1339 100. Loogväli E-L, *et al.* Disuniting Uniformity: A Pied Cladistic Canvas of mtDNA  
1340 Haplogroup H in Eurasia. *Molecular Biology and Evolution* **21**, 2012-2021 (2004).  
1341
- 1342 101. Roostalu U, *et al.* Origin and expansion of haplogroup H, the dominant human  
1343 mitochondrial DNA lineage in West Eurasia: the Near Eastern and Caucasian  
1344 perspective. *Molecular Biology and Evolution* **24**, 436-448 (2007).  
1345
- 1346 102. Ennafaa H, *et al.* Mitochondrial DNA haplogroup H structure in North Africa. *BMC*  
1347 *Genetics* **10**, 8 (2009).  
1348
- 1349 103. Brotherton P, *et al.* Neolithic mitochondrial haplogroup H genomes and the genetic  
1350 origins of Europeans. *Nature Communications* **4**, 1764 (2013).  
1351
- 1352 104. Fadhlouli-Zid K, Rodríguez-Botigué L, Naoui N, Benammar-Elgaaied A, Calafell F,  
1353 Comas D. Mitochondrial DNA structure in North Africa reveals a genetic discontinuity in  
1354 the Nile Valley. *American Journal of Physical Anthropology* **145**, 107-117 (2011).
