# Supplementary material for: Social stratification without genetic differentiation at the site of Kulubnarti in Christian Period Nubia
Source: PubMed Central journal article supplement (PMC8671435; doi:10.1038/s41467-021-27356-8), 2021-12-14
Supplement: 41467_2021_27356_MOESM3_ESM.pdf [file 41467_2021_27356_MOESM3_ESM.pdf]

## Description of Additional Supplementary Files

File Name: Supplementary Data 1

Description: **Skeletal material screened for analysis in the present study.** Screening at UCD took place via shotgun sequencing on a MiSeq or NextSeq500 instrument; individuals screened at UCD were not given a Master ID (see Supplementary Note 2 for additional information). Individuals labeled with asterisk (\*) are lower-coverage first-degree relatives of another individual in our dataset and were not included in statistical analyses.

File Name: Supplementary Data 2

Description: **Library-level information for the newly reported individuals in this study.**

File Name: Supplementary Data 3

Description: **Ancient West Eurasian and African individuals used in the reference dataset of this work.**

File Name: Supplementary Data 4

Description: **Individuals included in PCA.**

File Name: Supplementary Data 5

Description: **Admixture f3-statistics show a history of admixture between Nilotic-related ancestry (A) and West Eurasian-related ancestry (B) at Kulubnarti.**

File Name: Supplementary Data 6

Description: **Individual f4-statistics testing for excess Nilotic- or West Eurasian-related ancestry.** Results with  $|Z| > 5.0$  in bold (interpreted as genetic outlier), results with  $|Z| > 3.0$  in italics. Individuals labeled with asterisk (\*) are lower-coverage first-degree relatives of another individual in our dataset.

File Name: Supplementary Data 7

Description: **Results of qpAdm modeling; models interpreted as significant ( $p > 0.05$ ) in bold.** O9 reference set: Mbuti, Onge, Chukchi, Karitiana, Papuan, Han, Ust Ishim, MA1, Kostenki14

File Name: Supplementary Data 8

Description: **qpAdm estimates of individual ancestry proportions. Individuals in bold are considered genetic outliers in this work.** Reference set: O9 ( Mbuti, Onge, Chukchi, Karitiana, Papuan, Han, Ust Ishim, MA1, Kostenki14) + Anatolia\_EBA

File Name: Supplementary Data 9

Description: **qpWave modelling; models interpreted as significant ( $p > 0.05$ ) in bold.**

File Name: Supplementary Data 10

Description: **Group f4-statistics testing for excess Nilotic- or West Eurasian-related ancestry in the S and R cemeteries.**

File Name: Supplementary Data 11

Description: **Estimated dates of admixture at Kulubnarti.** Only estimates with  $|Z| > 2.8$  reported (corresponding to a 99.5% CI).

File Name: Supplementary Data 12

Description: **mtDNA haplogroup calls and mutations. Calls made with Haplogrep Classify v2.2.8.**

File Name: Supplementary Data 13

Description: **Y chromosome haplogroups.**

File Name: Supplementary Data 14

Description: **Estimated dates of admixture for three present-day Nubian groups.** Models in bold discussed in main text. Models using Nuer and TSI as sources included here for comparability with Hollfelder et al. (2017).
